# Supplementary material for: Computational Approach to Investigating Key GO Terms and KEGG Pathways Associated with CNV
Source: Biomed Res Int. 2018 Apr 11;2018:8406857. doi: 10.1155/2018/8406857 (PMC5925134; doi:10.1155/2018/8406857)
Supplement: Supplementary Materials — The supplementary materials consist of two files. Supplementary Material S1: positive and negative samples in the dataset represented by their gene symbols. Supplementary Material S2: MaxRel feature list as an output of the mRMR method with ranked 20,983 features. [file 8406857.f1.zip]

Archive with 2 entries (2 files):
- 8406857.f1.xlsx
- 8406857.f2.xlsx
