# Supplementary material for: Computational Approach to Investigating Key GO Terms and KEGG Pathways Associated with CNV
Source: Biomed Res Int. 2018 Apr 11;2018:8406857. doi: 10.1155/2018/8406857 (PMC5925134; doi:10.1155/2018/8406857)
Supplement: Supplementary Materials — The supplementary materials consist of two files. Supplementary Material S1: positive and negative samples in the dataset represented by their gene symbols. Supplementary Material S2: MaxRel feature list as an output of the mRMR method with ranked 20,983 features. [file 8406857.f1.zip › 8406857.f1.xlsx]

## Sheet: Sheet1
Ensembl ID	Positive or negative
ENSP00000218388	Positive
ENSP00000378786	Positive
ENSP00000265753	Positive
ENSP00000297258	Positive
ENSP00000347596	Positive
ENSP00000264376	Positive
ENSP00000266718	Positive
ENSP00000231061	Positive
ENSP00000299529	Positive
ENSP00000374372	Positive
ENSP00000336829	Positive
ENSP00000324173	Positive
ENSP00000296271	Positive
ENSP00000278968	Positive
ENSP00000361405	Positive
ENSP00000291554	Positive
ENSP00000346839	Positive
ENSP00000294728	Positive
ENSP00000356954	Positive
ENSP00000295113	Positive
ENSP00000315130	Positive
ENSP00000352119	Positive
ENSP00000261405	Positive
ENSP00000224237	Positive
ENSP00000252486	Positive
ENSP00000253408	Positive
ENSP00000226299	Positive
ENSP00000268125	Positive
ENSP00000252590	Positive
ENSP00000354687	Negative
ENSP00000355046	Negative
ENSP00000354499	Negative
ENSP00000354876	Negative
ENSP00000355265	Negative
ENSP00000354632	Negative
ENSP00000354982	Negative
ENSP00000355206	Negative
ENSP00000354728	Negative
ENSP00000354961	Negative
ENSP00000354813	Negative
ENSP00000354665	Negative
ENSP00000354554	Negative
ENSP00000335041	Negative
ENSP00000329647	Negative
ENSP00000257287	Negative
ENSP00000235332	Negative
ENSP00000364370	Negative
ENSP00000227520	Negative
ENSP00000369440	Negative
ENSP00000268459	Negative
ENSP00000395772	Negative
ENSP00000261789	Negative
ENSP00000433967	Negative
ENSP00000264982	Negative
ENSP00000262894	Negative
ENSP00000377083	Negative
ENSP00000376794	Negative
ENSP00000219689	Negative
ENSP00000280571	Negative
ENSP00000372093	Negative
ENSP00000339795	Negative
ENSP00000227752	Negative
ENSP00000354251	Negative
ENSP00000361170	Negative
ENSP00000312368	Negative
ENSP00000376855	Negative
ENSP00000226225	Negative
ENSP00000352839	Negative
ENSP00000264883	Negative
ENSP00000387564	Negative
ENSP00000297405	Negative
ENSP00000349313	Negative
ENSP00000278060	Negative
ENSP00000359403	Negative
ENSP00000367878	Negative
ENSP00000305875	Negative
ENSP00000284476	Negative
ENSP00000368264	Negative
ENSP00000351777	Negative
ENSP00000271640	Negative
ENSP00000334625	Negative
ENSP00000361895	Negative
ENSP00000287647	Negative
ENSP00000302189	Negative
ENSP00000307134	Negative
ENSP00000289902	Negative
ENSP00000357153	Negative
ENSP00000307887	Negative
ENSP00000338742	Negative
ENSP00000373176	Negative
ENSP00000330218	Negative
ENSP00000225792	Negative
ENSP00000347032	Negative
ENSP00000273062	Negative
ENSP00000443432	Negative
ENSP00000001146	Negative
ENSP00000268607	Negative
ENSP00000381129	Negative
ENSP00000299441	Negative
ENSP00000419194	Negative
ENSP00000361558	Negative
ENSP00000313454	Negative
ENSP00000431459	Negative
ENSP00000334849	Negative
ENSP00000272771	Negative
ENSP00000392057	Negative
ENSP00000384515	Negative
ENSP00000394487	Negative
ENSP00000377789	Negative
ENSP00000229595	Negative
ENSP00000307860	Negative
ENSP00000365514	Negative
ENSP00000362888	Negative
ENSP00000415904	Negative
ENSP00000218099	Negative
ENSP00000216122	Negative
ENSP00000278949	Negative
ENSP00000233596	Negative
ENSP00000302476	Negative
ENSP00000334181	Negative
ENSP00000326718	Negative
ENSP00000339730	Negative
ENSP00000327541	Negative
ENSP00000414055	Negative
ENSP00000256999	Negative
ENSP00000429200	Negative
ENSP00000309899	Negative
ENSP00000369600	Negative
ENSP00000377833	Negative
ENSP00000403925	Negative
ENSP00000249440	Negative
ENSP00000369407	Negative
ENSP00000425658	Negative
ENSP00000222598	Negative
ENSP00000313504	Negative
ENSP00000339161	Negative
ENSP00000418668	Negative
ENSP00000183605	Negative
ENSP00000368758	Negative
ENSP00000299866	Negative
ENSP00000341489	Negative
ENSP00000325301	Negative
ENSP00000378735	Negative
ENSP00000362588	Negative
ENSP00000194118	Negative
ENSP00000237858	Negative
ENSP00000389792	Negative
ENSP00000267938	Negative
ENSP00000261700	Negative
ENSP00000377783	Negative
ENSP00000300413	Negative
ENSP00000402608	Negative
ENSP00000305355	Negative
ENSP00000321845	Negative
ENSP00000272065	Negative
ENSP00000368759	Negative
ENSP00000305161	Negative
ENSP00000380251	Negative
ENSP00000363768	Negative
ENSP00000334068	Negative
ENSP00000261488	Negative
ENSP00000414851	Negative
ENSP00000385995	Negative
ENSP00000470381	Negative
ENSP00000270631	Negative
ENSP00000011292	Negative
ENSP00000324882	Negative
ENSP00000366326	Negative
ENSP00000303822	Negative
ENSP00000253354	Negative
ENSP00000368314	Negative
ENSP00000339916	Negative
ENSP00000471000	Negative
ENSP00000215739	Negative
ENSP00000375220	Negative
ENSP00000358831	Negative
ENSP00000371577	Negative
ENSP00000373472	Negative
ENSP00000418491	Negative
ENSP00000264914	Negative
ENSP00000370420	Negative
ENSP00000356905	Negative
ENSP00000369251	Negative
ENSP00000296946	Negative
ENSP00000296859	Negative
ENSP00000319635	Negative
ENSP00000367959	Negative
ENSP00000309103	Negative
ENSP00000259607	Negative
ENSP00000259205	Negative
ENSP00000353796	Negative
ENSP00000380313	Negative
ENSP00000336741	Negative
ENSP00000393876	Negative
ENSP00000306637	Negative
ENSP00000322775	Negative
ENSP00000305263	Negative
ENSP00000269214	Negative
ENSP00000319388	Negative
ENSP00000273283	Negative
ENSP00000249842	Negative
ENSP00000371420	Negative
ENSP00000256190	Negative
ENSP00000410007	Negative
ENSP00000363557	Negative
ENSP00000379176	Negative
ENSP00000430487	Negative
ENSP00000405965	Negative
ENSP00000366452	Negative
ENSP00000371505	Negative
ENSP00000247665	Negative
ENSP00000315263	Negative
ENSP00000267594	Negative
ENSP00000359310	Negative
ENSP00000261839	Negative
ENSP00000273153	Negative
ENSP00000352639	Negative
ENSP00000310241	Negative
ENSP00000264380	Negative
ENSP00000399588	Negative
ENSP00000385083	Negative
ENSP00000356385	Negative
ENSP00000338703	Negative
ENSP00000396304	Negative
ENSP00000307443	Negative
ENSP00000434480	Negative
ENSP00000277216	Negative
ENSP00000209668	Negative
ENSP00000370479	Negative
ENSP00000316482	Negative
ENSP00000265715	Negative
ENSP00000410768	Negative
ENSP00000311513	Negative
ENSP00000446100	Negative
ENSP00000353512	Negative
ENSP00000375975	Negative
ENSP00000297001	Negative
ENSP00000262300	Negative
ENSP00000362873	Negative
ENSP00000263388	Negative
ENSP00000401502	Negative
ENSP00000254663	Negative
ENSP00000231198	Negative
ENSP00000456026	Negative
ENSP00000200453	Negative
ENSP00000427687	Negative
ENSP00000405210	Negative
ENSP00000429064	Negative
ENSP00000254803	Negative
ENSP00000376786	Negative
ENSP00000283752	Negative
ENSP00000405218	Negative
ENSP00000280358	Negative
ENSP00000287600	Negative
ENSP00000300935	Negative
ENSP00000371994	Negative
ENSP00000382883	Negative
ENSP00000438125	Negative
ENSP00000396160	Negative
ENSP00000329137	Negative
ENSP00000404079	Negative
ENSP00000350256	Negative
ENSP00000465517	Negative
ENSP00000328789	Negative
ENSP00000304710	Negative
ENSP00000315870	Negative
ENSP00000367841	Negative
ENSP00000432688	Negative
ENSP00000263093	Negative
ENSP00000311609	Negative
ENSP00000381008	Negative
ENSP00000337146	Negative
ENSP00000341108	Negative
ENSP00000273668	Negative
ENSP00000355645	Negative
ENSP00000307706	Negative
ENSP00000239878	Negative
ENSP00000223864	Negative
ENSP00000281623	Negative
ENSP00000429803	Negative
ENSP00000317842	Negative
ENSP00000350549	Negative
ENSP00000362574	Negative
ENSP00000305065	Negative
ENSP00000331912	Negative
ENSP00000288670	Negative
ENSP00000265717	Negative
ENSP00000354691	Negative
ENSP00000323068	Negative
ENSP00000312981	Negative
ENSP00000367378	Negative
ENSP00000325819	Negative
ENSP00000370303	Negative
ENSP00000324890	Negative
ENSP00000216185	Negative
ENSP00000296499	Negative
ENSP00000352849	Negative
ENSP00000260356	Negative
ENSP00000378492	Negative
ENSP00000379108	Negative
ENSP00000354032	Negative
ENSP00000374135	Negative
ENSP00000378624	Negative
ENSP00000268058	Negative
ENSP00000316950	Negative
ENSP00000380888	Negative
ENSP00000309913	Negative
ENSP00000325681	Negative
ENSP00000234111	Negative
ENSP00000398803	Negative
ENSP00000368646	Negative
ENSP00000373254	Negative
ENSP00000366582	Negative
ENSP00000308022	Negative
ENSP00000372649	Negative
ENSP00000357412	Negative
ENSP00000295658	Negative
ENSP00000320430	Negative
ENSP00000244007	Negative
ENSP00000221086	Negative
ENSP00000405176	Negative
ENSP00000376337	Negative
ENSP00000279068	Negative
ENSP00000371085	Negative
ENSP00000355384	Negative
ENSP00000292433	Negative
ENSP00000361066	Negative
ENSP00000221307	Negative
ENSP00000257863	Negative
ENSP00000344254	Negative
ENSP00000222390	Negative
ENSP00000360761	Negative
ENSP00000307188	Negative
ENSP00000369573	Negative
ENSP00000262213	Negative
ENSP00000357927	Negative
ENSP00000274364	Negative
ENSP00000350512	Negative
ENSP00000358716	Negative
ENSP00000264220	Negative
ENSP00000471905	Negative
ENSP00000327431	Negative
ENSP00000274031	Negative
ENSP00000219054	Negative
ENSP00000335084	Negative
ENSP00000465204	Negative
ENSP00000296529	Negative
ENSP00000262225	Negative
ENSP00000404860	Negative
ENSP00000472467	Negative
ENSP00000373194	Negative
ENSP00000264972	Negative
ENSP00000339016	Negative
ENSP00000352846	Negative
ENSP00000350734	Negative
ENSP00000404403	Negative
ENSP00000373674	Negative
ENSP00000384192	Negative
ENSP00000401303	Negative
ENSP00000262146	Negative
ENSP00000376609	Negative
ENSP00000377944	Negative
ENSP00000343021	Negative
ENSP00000258772	Negative
ENSP00000310036	Negative
ENSP00000205557	Negative
ENSP00000287038	Negative
ENSP00000466051	Negative
ENSP00000371126	Negative
ENSP00000345044	Negative
ENSP00000244496	Negative
ENSP00000334128	Negative
ENSP00000277903	Negative
ENSP00000207157	Negative
ENSP00000297282	Negative
ENSP00000239231	Negative
ENSP00000358857	Negative
ENSP00000346575	Negative
ENSP00000259698	Negative
ENSP00000368720	Negative
ENSP00000359729	Negative
ENSP00000350263	Negative
ENSP00000349098	Negative
ENSP00000376899	Negative
ENSP00000268533	Negative
ENSP00000348772	Negative
ENSP00000325822	Negative
ENSP00000311429	Negative
ENSP00000345719	Negative
ENSP00000386166	Negative
ENSP00000415030	Negative
ENSP00000340526	Negative
ENSP00000303092	Negative
ENSP00000304108	Negative
ENSP00000362181	Negative
ENSP00000299847	Negative
ENSP00000302756	Negative
ENSP00000389841	Negative
ENSP00000453364	Negative
ENSP00000261402	Negative
ENSP00000331897	Negative
ENSP00000369654	Negative
ENSP00000328777	Negative
ENSP00000368761	Negative
ENSP00000329794	Negative
ENSP00000438400	Negative
ENSP00000331057	Negative
ENSP00000267884	Negative
ENSP00000260753	Negative
ENSP00000299206	Negative
ENSP00000332690	Negative
ENSP00000427015	Negative
ENSP00000245323	Negative
ENSP00000245046	Negative
ENSP00000363894	Negative
ENSP00000357425	Negative
ENSP00000359837	Negative
ENSP00000337432	Negative
ENSP00000297540	Negative
ENSP00000360635	Negative
ENSP00000351933	Negative
ENSP00000355480	Negative
ENSP00000346671	Negative
ENSP00000297904	Negative
ENSP00000330488	Negative
ENSP00000361547	Negative
ENSP00000326841	Negative
ENSP00000323714	Negative
ENSP00000404179	Negative
ENSP00000360035	Negative
ENSP00000410216	Negative
ENSP00000322273	Negative
ENSP00000415769	Negative
ENSP00000424151	Negative
ENSP00000424707	Negative
ENSP00000327545	Negative
ENSP00000351379	Negative
ENSP00000251643	Negative
ENSP00000243286	Negative
ENSP00000377078	Negative
ENSP00000301945	Negative
ENSP00000255476	Negative
ENSP00000294829	Negative
ENSP00000166244	Negative
ENSP00000356630	Negative
ENSP00000317743	Negative
ENSP00000247815	Negative
ENSP00000365261	Negative
ENSP00000338862	Negative
ENSP00000262570	Negative
ENSP00000248098	Negative
ENSP00000314901	Negative
ENSP00000398017	Negative
ENSP00000353826	Negative
ENSP00000312946	Negative
ENSP00000311224	Negative
ENSP00000448165	Negative
ENSP00000407182	Negative
ENSP00000304903	Negative
ENSP00000378857	Negative
ENSP00000329448	Negative
ENSP00000361010	Negative
ENSP00000315357	Negative
ENSP00000239449	Negative
ENSP00000303696	Negative
ENSP00000345873	Negative
ENSP00000342019	Negative
ENSP00000304592	Negative
ENSP00000297613	Negative
ENSP00000369757	Negative
ENSP00000361518	Negative
ENSP00000324025	Negative
ENSP00000447378	Negative
ENSP00000240139	Negative
ENSP00000427562	Negative
ENSP00000333376	Negative
ENSP00000369976	Negative
ENSP00000264316	Negative
ENSP00000323328	Negative
ENSP00000222543	Negative
ENSP00000421655	Negative
ENSP00000259818	Negative
ENSP00000326581	Negative
ENSP00000254043	Negative
ENSP00000246151	Negative
ENSP00000249923	Negative
ENSP00000448789	Negative
ENSP00000238341	Negative
ENSP00000279968	Negative
ENSP00000298532	Negative
ENSP00000379607	Negative
ENSP00000423673	Negative
ENSP00000302324	Negative
ENSP00000339356	Negative
ENSP00000355260	Negative
ENSP00000356632	Negative
ENSP00000309336	Negative
ENSP00000305221	Negative
ENSP00000261191	Negative
ENSP00000312272	Negative
ENSP00000365402	Negative
ENSP00000380872	Negative
ENSP00000348496	Negative
ENSP00000357452	Negative
ENSP00000268919	Negative
ENSP00000260270	Negative
ENSP00000373347	Negative
ENSP00000371786	Negative
ENSP00000316152	Negative
ENSP00000367318	Negative
ENSP00000424838	Negative
ENSP00000465894	Negative
ENSP00000424424	Negative
ENSP00000262895	Negative
ENSP00000308873	Negative
ENSP00000245539	Negative
ENSP00000386151	Negative
ENSP00000296029	Negative
ENSP00000388825	Negative
ENSP00000341737	Negative
ENSP00000389414	Negative
ENSP00000295500	Negative
ENSP00000349547	Negative
ENSP00000367196	Negative
ENSP00000364140	Negative
ENSP00000337144	Negative
ENSP00000259241	Negative
ENSP00000265038	Negative
ENSP00000312789	Negative
ENSP00000219271	Negative
ENSP00000330945	Negative
ENSP00000398930	Negative
ENSP00000300404	Negative
ENSP00000290894	Negative
ENSP00000364784	Negative
ENSP00000373191	Negative
ENSP00000430237	Negative
ENSP00000295228	Negative
ENSP00000398273	Negative
ENSP00000276708	Negative
ENSP00000198801	Negative
ENSP00000316496	Negative
ENSP00000351939	Negative
ENSP00000302276	Negative
ENSP00000368391	Negative
ENSP00000235307	Negative
ENSP00000350425	Negative
ENSP00000247225	Negative
ENSP00000265107	Negative
ENSP00000378845	Negative
ENSP00000302105	Negative
ENSP00000230565	Negative
ENSP00000354911	Negative
ENSP00000390941	Negative
ENSP00000309402	Negative
ENSP00000367794	Negative
ENSP00000369349	Negative
ENSP00000350005	Negative
ENSP00000362133	Negative
ENSP00000370984	Negative
ENSP00000360183	Negative
ENSP00000331397	Negative
ENSP00000333547	Negative
ENSP00000219255	Negative
ENSP00000261854	Negative
ENSP00000397679	Negative
ENSP00000338235	Negative
ENSP00000326219	Negative
ENSP00000216968	Negative
ENSP00000302289	Negative
ENSP00000274569	Negative
ENSP00000362613	Negative
ENSP00000332013	Negative
ENSP00000325038	Negative
ENSP00000352400	Negative
ENSP00000386911	Negative
ENSP00000435096	Negative
ENSP00000320709	Negative
ENSP00000336655	Negative
ENSP00000375986	Negative
ENSP00000351695	Negative
ENSP00000262429	Negative
ENSP00000344942	Negative
ENSP00000242285	Negative
ENSP00000366565	Negative
ENSP00000386121	Negative
ENSP00000215574	Negative
ENSP00000386133	Negative
ENSP00000313803	Negative
ENSP00000387310	Negative
ENSP00000339933	Negative
ENSP00000259870	Negative
ENSP00000239165	Negative
ENSP00000383212	Negative
ENSP00000300215	Negative
ENSP00000415299	Negative
ENSP00000353427	Negative
ENSP00000343741	Negative
ENSP00000287538	Negative
ENSP00000215095	Negative
ENSP00000463159	Negative
ENSP00000447300	Negative
ENSP00000239144	Negative
ENSP00000217305	Negative
ENSP00000297578	Negative
ENSP00000257262	Negative
ENSP00000377112	Negative
ENSP00000344786	Negative
ENSP00000302676	Negative
ENSP00000343818	Negative
ENSP00000306614	Negative
ENSP00000237596	Negative
ENSP00000231238	Negative
ENSP00000340271	Negative
ENSP00000338349	Negative
ENSP00000384900	Negative
ENSP00000432799	Negative
ENSP00000335060	Negative
ENSP00000380321	Negative
ENSP00000348815	Negative
ENSP00000367102	Negative
ENSP00000353650	Negative
ENSP00000418259	Negative
ENSP00000241256	Negative
ENSP00000402595	Negative
ENSP00000368565	Negative
ENSP00000357840	Negative
ENSP00000366487	Negative
ENSP00000375629	Negative
ENSP00000265572	Negative
ENSP00000340660	Negative
ENSP00000365576	Negative
ENSP00000264202	Negative
ENSP00000357737	Negative
ENSP00000362994	Negative
ENSP00000376849	Negative
ENSP00000355809	Negative
ENSP00000278840	Negative
ENSP00000292778	Negative
ENSP00000417748	Negative
ENSP00000353988	Negative
ENSP00000371297	Negative
ENSP00000204726	Negative
ENSP00000282538	Negative
ENSP00000273146	Negative
ENSP00000250454	Negative
ENSP00000315569	Negative
ENSP00000244217	Negative
ENSP00000405268	Negative
ENSP00000370588	Negative
ENSP00000338283	Negative
ENSP00000317904	Negative
ENSP00000262013	Negative
ENSP00000403310	Negative
ENSP00000240651	Negative
ENSP00000308772	Negative
ENSP00000473047	Negative
ENSP00000370611	Negative
ENSP00000372025	Negative
ENSP00000375907	Negative
ENSP00000274532	Negative
ENSP00000411439	Negative
ENSP00000286614	Negative
ENSP00000373827	Negative
ENSP00000277657	Negative
ENSP00000219551	Negative
ENSP00000369996	Negative
ENSP00000254928	Negative
ENSP00000221922	Negative
ENSP00000380785	Negative
ENSP00000297186	Negative
ENSP00000353660	Negative
ENSP00000239666	Negative
ENSP00000302194	Negative
ENSP00000345055	Negative
ENSP00000332659	Negative
ENSP00000429344	Negative
ENSP00000406293	Negative
ENSP00000342118	Negative
ENSP00000359301	Negative
ENSP00000262629	Negative
ENSP00000203556	Negative
ENSP00000361083	Negative
ENSP00000342790	Negative
ENSP00000462023	Negative
ENSP00000385927	Negative
ENSP00000285039	Negative
ENSP00000246069	Negative
ENSP00000258530	Negative
ENSP00000325285	Negative
ENSP00000361097	Negative
ENSP00000259371	Negative
ENSP00000328173	Negative
ENSP00000457071	Negative
ENSP00000379669	Negative
ENSP00000318355	Negative
ENSP00000363753	Negative
ENSP00000276416	Negative
ENSP00000215980	Negative
ENSP00000295930	Negative
ENSP00000435550	Negative
ENSP00000371554	Negative
ENSP00000288680	Negative
ENSP00000296695	Negative
ENSP00000419088	Negative
ENSP00000382423	Negative
ENSP00000335481	Negative
ENSP00000250160	Negative
ENSP00000276373	Negative
ENSP00000295755	Negative
ENSP00000353677	Negative
ENSP00000330523	Negative
ENSP00000398454	Negative
ENSP00000452549	Negative
ENSP00000426964	Negative
ENSP00000423313	Negative
ENSP00000417424	Negative
ENSP00000303145	Negative
ENSP00000423067	Negative
ENSP00000386209	Negative
ENSP00000387356	Negative
ENSP00000328923	Negative
ENSP00000258428	Negative
ENSP00000269886	Negative
ENSP00000371040	Negative
ENSP00000217372	Negative
ENSP00000257749	Negative
ENSP00000366460	Negative
ENSP00000368887	Negative
ENSP00000397453	Negative
ENSP00000238256	Negative
ENSP00000423933	Negative
ENSP00000334219	Negative
ENSP00000282486	Negative
ENSP00000258317	Negative
ENSP00000256997	Negative
ENSP00000377040	Negative
ENSP00000369217	Negative
ENSP00000293599	Negative
ENSP00000295190	Negative
ENSP00000348211	Negative
ENSP00000216639	Negative
ENSP00000230053	Negative
ENSP00000408058	Negative
ENSP00000272427	Negative
ENSP00000361993	Negative
ENSP00000321627	Negative
ENSP00000344909	Negative
ENSP00000263341	Negative
ENSP00000380178	Negative
ENSP00000355797	Negative
ENSP00000216471	Negative
ENSP00000291552	Negative
ENSP00000406478	Negative
ENSP00000254528	Negative
ENSP00000274368	Negative
ENSP00000348489	Negative
ENSP00000327255	Negative
ENSP00000235933	Negative
ENSP00000296350	Negative
ENSP00000349970	Negative
ENSP00000236671	Negative
ENSP00000249822	Negative
ENSP00000369131	Negative
ENSP00000406046	Negative
ENSP00000256324	Negative
ENSP00000359607	Negative
ENSP00000363298	Negative
ENSP00000356105	Negative
ENSP00000299432	Negative
ENSP00000293443	Negative
ENSP00000308219	Negative
ENSP00000263663	Negative
ENSP00000327314	Negative
ENSP00000260810	Negative
ENSP00000377799	Negative
ENSP00000267023	Negative
ENSP00000357796	Negative
ENSP00000263063	Negative
ENSP00000365682	Negative
ENSP00000368808	Negative
ENSP00000455099	Negative
ENSP00000301263	Negative
ENSP00000327440	Negative
ENSP00000458130	Negative
ENSP00000409652	Negative
ENSP00000360938	Negative
ENSP00000282441	Negative
ENSP00000276440	Negative
ENSP00000230050	Negative
ENSP00000388910	Negative
ENSP00000337459	Negative
ENSP00000297146	Negative
ENSP00000465742	Negative
ENSP00000348635	Negative
ENSP00000262215	Negative
ENSP00000363431	Negative
ENSP00000369855	Negative
ENSP00000389087	Negative
ENSP00000302021	Negative
ENSP00000351732	Negative
ENSP00000374260	Negative
ENSP00000337320	Negative
ENSP00000296027	Negative
ENSP00000334394	Negative
ENSP00000249647	Negative
ENSP00000368965	Negative
ENSP00000211998	Negative
ENSP00000334223	Negative
ENSP00000299767	Negative
ENSP00000411593	Negative
ENSP00000439856	Negative
ENSP00000299626	Negative
ENSP00000396441	Negative
ENSP00000310998	Negative
ENSP00000359464	Negative
ENSP00000259008	Negative
ENSP00000307078	Negative
ENSP00000332969	Negative
ENSP00000270139	Negative
ENSP00000238651	Negative
ENSP00000227758	Negative
ENSP00000302621	Negative
ENSP00000395590	Negative
ENSP00000387298	Negative
ENSP00000242108	Negative
ENSP00000280155	Negative
ENSP00000382034	Negative
ENSP00000370299	Negative
ENSP00000262545	Negative
ENSP00000335578	Negative
ENSP00000370391	Negative
ENSP00000367705	Negative
ENSP00000311665	Negative
ENSP00000330190	Negative
ENSP00000206262	Negative
ENSP00000292894	Negative
ENSP00000303532	Negative
ENSP00000336725	Negative
ENSP00000295121	Negative
ENSP00000271588	Negative
ENSP00000262764	Negative
ENSP00000442563	Negative
ENSP00000254846	Negative
ENSP00000397947	Negative
ENSP00000352606	Negative
ENSP00000299300	Negative
ENSP00000166139	Negative
ENSP00000301364	Negative
ENSP00000395929	Negative
ENSP00000336524	Negative
ENSP00000254480	Negative
ENSP00000301180	Negative
ENSP00000346437	Negative
ENSP00000349494	Negative
ENSP00000304846	Negative
ENSP00000224140	Negative
ENSP00000384690	Negative
ENSP00000355022	Negative
ENSP00000290846	Negative
ENSP00000156471	Negative
ENSP00000385461	Negative
ENSP00000383365	Negative
ENSP00000339973	Negative
ENSP00000441410	Negative
ENSP00000391742	Negative
ENSP00000347916	Negative
ENSP00000228825	Negative
ENSP00000257818	Negative
ENSP00000252660	Negative
ENSP00000333363	Negative
ENSP00000356386	Negative
ENSP00000322617	Negative
ENSP00000302898	Negative
ENSP00000386796	Negative
ENSP00000451211	Negative
ENSP00000305892	Negative
ENSP00000364934	Negative
ENSP00000293851	Negative
ENSP00000221891	Negative
ENSP00000310127	Negative
ENSP00000339823	Negative
ENSP00000245414	Negative
ENSP00000262965	Negative
ENSP00000240304	Negative
ENSP00000383611	Negative
ENSP00000304783	Negative
ENSP00000381198	Negative
ENSP00000261167	Negative
ENSP00000286031	Negative
ENSP00000299727	Negative
ENSP00000349708	Negative
ENSP00000306662	Negative
ENSP00000302830	Negative
ENSP00000377971	Negative
ENSP00000343619	Negative
ENSP00000362931	Negative
ENSP00000320337	Negative
ENSP00000333744	Negative
ENSP00000258770	Negative
ENSP00000306497	Negative
ENSP00000291823	Negative
ENSP00000242576	Negative
ENSP00000248879	Negative
ENSP00000296257	Negative
ENSP00000376423	Negative
ENSP00000259915	Negative
ENSP00000282018	Negative
ENSP00000252242	Negative
ENSP00000363836	Negative
ENSP00000283921	Negative
ENSP00000377086	Negative
ENSP00000240093	Negative
ENSP00000348050	Negative
ENSP00000454926	Negative
ENSP00000362171	Negative
ENSP00000307863	Negative
ENSP00000360597	Negative
ENSP00000262210	Negative
ENSP00000404375	Negative
ENSP00000285273	Negative
ENSP00000356375	Negative
ENSP00000387662	Negative
ENSP00000370968	Negative
ENSP00000256652	Negative
ENSP00000349678	Negative
ENSP00000369643	Negative
ENSP00000359891	Negative
ENSP00000246957	Negative
ENSP00000352702	Negative
ENSP00000219091	Negative
ENSP00000263918	Negative
ENSP00000311405	Negative
ENSP00000341327	Negative
ENSP00000293771	Negative
ENSP00000390630	Negative
ENSP00000351492	Negative
ENSP00000419199	Negative
ENSP00000365694	Negative
ENSP00000225964	Negative
ENSP00000368982	Negative
ENSP00000253968	Negative
ENSP00000323670	Negative
ENSP00000424711	Negative
ENSP00000330075	Negative
ENSP00000304004	Negative
ENSP00000359782	Negative
ENSP00000423897	Negative
ENSP00000370254	Negative
ENSP00000334448	Negative
ENSP00000408910	Negative
ENSP00000296220	Negative
ENSP00000359234	Negative
ENSP00000268695	Negative
ENSP00000428982	Negative
ENSP00000393963	Negative
ENSP00000271324	Negative
ENSP00000393840	Negative
ENSP00000268605	Negative
ENSP00000334134	Negative
ENSP00000369268	Negative
ENSP00000350592	Negative
ENSP00000264674	Negative
ENSP00000420040	Negative
ENSP00000027335	Negative
ENSP00000229030	Negative
ENSP00000351466	Negative
ENSP00000361483	Negative
ENSP00000246080	Negative
ENSP00000258761	Negative
ENSP00000292823	Negative
ENSP00000356908	Negative
ENSP00000385158	Negative
ENSP00000354681	Negative
ENSP00000307889	Negative
ENSP00000301458	Negative
ENSP00000377390	Negative
ENSP00000309126	Negative
ENSP00000323184	Negative
ENSP00000355799	Negative
ENSP00000363980	Negative
ENSP00000354525	Negative
ENSP00000326630	Negative
ENSP00000421686	Negative
ENSP00000334563	Negative
ENSP00000337949	Negative
ENSP00000369513	Negative
ENSP00000355231	Negative
ENSP00000247271	Negative
ENSP00000348510	Negative
ENSP00000220669	Negative
ENSP00000362991	Negative
ENSP00000261292	Negative
ENSP00000354775	Negative
ENSP00000366690	Negative
ENSP00000287814	Negative
ENSP00000264381	Negative
ENSP00000337332	Negative
ENSP00000284951	Negative
ENSP00000292562	Negative
ENSP00000312277	Negative
ENSP00000355465	Negative
ENSP00000229854	Negative
ENSP00000320936	Negative
ENSP00000221466	Negative
ENSP00000405726	Negative
ENSP00000281928	Negative
ENSP00000355084	Negative
ENSP00000353114	Negative
ENSP00000261796	Negative
ENSP00000340864	Negative
ENSP00000216127	Negative
ENSP00000362082	Negative
ENSP00000334474	Negative
ENSP00000305919	Negative
ENSP00000375232	Negative
ENSP00000377769	Negative
ENSP00000304229	Negative
ENSP00000300408	Negative
ENSP00000285419	Negative
ENSP00000268719	Negative
ENSP00000365898	Negative
ENSP00000452237	Negative
ENSP00000293525	Negative
ENSP00000259339	Negative
ENSP00000358064	Negative
ENSP00000290341	Negative
ENSP00000363500	Negative
ENSP00000329380	Negative
ENSP00000332806	Negative
ENSP00000253255	Negative
ENSP00000455469	Negative
ENSP00000226951	Negative
ENSP00000417185	Negative
ENSP00000417580	Negative
ENSP00000331746	Negative
ENSP00000349238	Negative
ENSP00000220853	Negative
ENSP00000317671	Negative
ENSP00000318629	Negative
ENSP00000371272	Negative
ENSP00000355500	Negative
ENSP00000359892	Negative
ENSP00000361556	Negative
ENSP00000353025	Negative
ENSP00000369578	Negative
ENSP00000226193	Negative
ENSP00000346550	Negative
ENSP00000390750	Negative
ENSP00000332530	Negative
ENSP00000330432	Negative
ENSP00000295266	Negative
ENSP00000267890	Negative
ENSP00000383901	Negative
ENSP00000380880	Negative
ENSP00000265594	Negative
ENSP00000351206	Negative
ENSP00000323071	Negative
ENSP00000461413	Negative
ENSP00000358715	Negative
ENSP00000361162	Negative
ENSP00000466680	Negative
ENSP00000277458	Negative
ENSP00000306275	Negative
ENSP00000386167	Negative
ENSP00000346017	Negative
ENSP00000223641	Negative
ENSP00000310491	Negative
ENSP00000363211	Negative
ENSP00000264870	Negative
ENSP00000239450	Negative
ENSP00000387911	Negative
ENSP00000204517	Negative
ENSP00000349291	Negative
ENSP00000404676	Negative
ENSP00000026218	Negative
ENSP00000380488	Negative
ENSP00000342755	Negative
ENSP00000199708	Negative
ENSP00000261233	Negative
ENSP00000334940	Negative
ENSP00000334393	Negative
ENSP00000360645	Negative
ENSP00000308925	Negative
ENSP00000342011	Negative
ENSP00000363988	Negative
ENSP00000384675	Negative
ENSP00000268383	Negative
ENSP00000365906	Negative
ENSP00000323423	Negative
ENSP00000370151	Negative
ENSP00000271357	Negative
ENSP00000313384	Negative
ENSP00000368798	Negative
ENSP00000408581	Negative
ENSP00000338934	Negative
ENSP00000370126	Negative
ENSP00000331310	Negative
ENSP00000267512	Negative
ENSP00000370394	Negative
ENSP00000325748	Negative
ENSP00000007969	Negative
ENSP00000385099	Negative
ENSP00000387875	Negative
ENSP00000347999	Negative
ENSP00000354620	Negative
ENSP00000333946	Negative
ENSP00000181383	Negative
ENSP00000356991	Negative
ENSP00000332973	Negative
ENSP00000448811	Negative
ENSP00000389381	Negative
ENSP00000300289	Negative
ENSP00000381780	Negative
ENSP00000312439	Negative
ENSP00000364493	Negative
ENSP00000355370	Negative
ENSP00000357905	Negative
ENSP00000225873	Negative
ENSP00000314505	Negative
ENSP00000249499	Negative
ENSP00000349208	Negative
ENSP00000359410	Negative
ENSP00000315635	Negative
ENSP00000239444	Negative
ENSP00000397050	Negative
ENSP00000334941	Negative
ENSP00000354453	Negative
ENSP00000393953	Negative
ENSP00000367715	Negative
ENSP00000433433	Negative
ENSP00000272452	Negative
ENSP00000261435	Negative
ENSP00000333037	Negative
ENSP00000302319	Negative
ENSP00000410858	Negative
ENSP00000306561	Negative
ENSP00000358154	Negative
ENSP00000312262	Negative
ENSP00000289547	Negative
ENSP00000452252	Negative
ENSP00000280082	Negative
ENSP00000257527	Negative
ENSP00000389175	Negative
ENSP00000350708	Negative
ENSP00000261574	Negative
ENSP00000366827	Negative
ENSP00000289968	Negative
ENSP00000358878	Negative
ENSP00000265720	Negative
ENSP00000381412	Negative
ENSP00000282096	Negative
ENSP00000358814	Negative
ENSP00000409423	Negative
ENSP00000296490	Negative
ENSP00000253794	Negative
ENSP00000407487	Negative
ENSP00000278853	Negative
ENSP00000294016	Negative
ENSP00000432353	Negative
ENSP00000256689	Negative
ENSP00000268043	Negative
ENSP00000265997	Negative
ENSP00000374036	Negative
ENSP00000312535	Negative
ENSP00000405574	Negative
ENSP00000348205	Negative
ENSP00000356988	Negative
ENSP00000300134	Negative
ENSP00000292782	Negative
ENSP00000294600	Negative
ENSP00000316328	Negative
ENSP00000392257	Negative
ENSP00000383840	Negative
ENSP00000270517	Negative
ENSP00000256103	Negative
ENSP00000368362	Negative
ENSP00000339801	Negative
ENSP00000350467	Negative
ENSP00000347232	Negative
ENSP00000396320	Negative
ENSP00000406209	Negative
ENSP00000335255	Negative
ENSP00000307954	Negative
ENSP00000292779	Negative
ENSP00000284885	Negative
ENSP00000264645	Negative
ENSP00000392252	Negative
ENSP00000390407	Negative
ENSP00000368226	Negative
ENSP00000386171	Negative
ENSP00000358478	Negative
ENSP00000457423	Negative
ENSP00000394380	Negative
ENSP00000389252	Negative
ENSP00000336887	Negative
ENSP00000289805	Negative
ENSP00000392204	Negative
ENSP00000330721	Negative
ENSP00000340672	Negative
ENSP00000364023	Negative
ENSP00000315203	Negative
ENSP00000305422	Negative
ENSP00000308541	Negative
ENSP00000324205	Negative
ENSP00000359151	Negative
ENSP00000264995	Negative
ENSP00000260453	Negative
ENSP00000363021	Negative
ENSP00000306461	Negative
ENSP00000361289	Negative
ENSP00000293414	Negative
ENSP00000366248	Negative
ENSP00000378286	Negative
ENSP00000416658	Negative
ENSP00000439128	Negative
ENSP00000230449	Negative
ENSP00000377771	Negative
ENSP00000412673	Negative
ENSP00000262646	Negative
ENSP00000258390	Negative
ENSP00000296585	Negative
ENSP00000456333	Negative
ENSP00000424243	Negative
ENSP00000358617	Negative
ENSP00000380514	Negative
ENSP00000260526	Negative
ENSP00000363868	Negative
ENSP00000361929	Negative
ENSP00000298352	Negative
ENSP00000272163	Negative
ENSP00000370767	Negative
ENSP00000345029	Negative
ENSP00000221462	Negative
ENSP00000267064	Negative
ENSP00000370293	Negative
ENSP00000332163	Negative
ENSP00000382867	Negative
ENSP00000266659	Negative
ENSP00000318472	Negative
ENSP00000317027	Negative
ENSP00000263635	Negative
ENSP00000333193	Negative
ENSP00000342793	Negative
ENSP00000278937	Negative
ENSP00000283429	Negative
ENSP00000357753	Negative
ENSP00000284601	Negative
ENSP00000356389	Negative
ENSP00000349932	Negative
ENSP00000372112	Negative
ENSP00000364412	Negative
ENSP00000405674	Negative
ENSP00000248070	Negative
ENSP00000267339	Negative
ENSP00000346805	Negative
ENSP00000266086	Negative
ENSP00000329097	Negative
ENSP00000350911	Negative
ENSP00000260113	Negative
ENSP00000362751	Negative
ENSP00000261712	Negative
ENSP00000276646	Negative
ENSP00000286835	Negative
ENSP00000312599	Negative
ENSP00000392410	Negative
ENSP00000346729	Negative
ENSP00000313809	Negative
ENSP00000291182	Negative
ENSP00000348936	Negative
ENSP00000377043	Negative
ENSP00000303508	Negative
ENSP00000262653	Negative
ENSP00000358812	Negative
ENSP00000246081	Negative
ENSP00000358605	Negative
ENSP00000455307	Negative
ENSP00000171757	Negative
ENSP00000256367	Negative
ENSP00000376548	Negative
ENSP00000328062	Negative
ENSP00000246529	Negative
ENSP00000297814	Negative
ENSP00000362332	Negative
ENSP00000254759	Negative
ENSP00000237937	Negative
ENSP00000317895	Negative
ENSP00000307041	Negative
ENSP00000242257	Negative
ENSP00000233813	Negative
ENSP00000301729	Negative
ENSP00000232854	Negative
ENSP00000346809	Negative
ENSP00000229179	Negative
ENSP00000289373	Negative
ENSP00000468308	Negative
ENSP00000278935	Negative
ENSP00000281142	Negative
ENSP00000260702	Negative
ENSP00000342156	Negative
ENSP00000308897	Negative
ENSP00000419449	Negative
ENSP00000357086	Negative
ENSP00000245663	Negative
ENSP00000274030	Negative
ENSP00000233957	Negative
ENSP00000434142	Negative
ENSP00000425561	Negative
ENSP00000449999	Negative
ENSP00000296326	Negative
ENSP00000306335	Negative
ENSP00000411827	Negative
ENSP00000308334	Negative
ENSP00000314407	Negative
ENSP00000231449	Negative
ENSP00000241312	Negative
ENSP00000198765	Negative
ENSP00000262406	Negative
ENSP00000338788	Negative
ENSP00000412365	Negative
ENSP00000256196	Negative
ENSP00000411409	Negative
ENSP00000270001	Negative
ENSP00000254051	Negative
ENSP00000370543	Negative
ENSP00000260116	Negative
ENSP00000268679	Negative
ENSP00000296504	Negative
ENSP00000406318	Negative
ENSP00000256412	Negative
ENSP00000319060	Negative
ENSP00000364041	Negative
ENSP00000447731	Negative
ENSP00000359333	Negative
ENSP00000310568	Negative
ENSP00000265379	Negative
ENSP00000274278	Negative
ENSP00000265440	Negative
ENSP00000367034	Negative
ENSP00000274140	Negative
ENSP00000281806	Negative
ENSP00000384400	Negative
ENSP00000323479	Negative
ENSP00000354610	Negative
ENSP00000354111	Negative
ENSP00000315693	Negative
ENSP00000450337	Negative
ENSP00000394484	Negative
ENSP00000246070	Negative
ENSP00000263088	Negative
ENSP00000341243	Negative
ENSP00000256015	Negative
ENSP00000397773	Negative
ENSP00000312506	Negative
ENSP00000352513	Negative
ENSP00000271373	Negative
ENSP00000303507	Negative
ENSP00000369351	Negative
ENSP00000328939	Negative
ENSP00000377280	Negative
ENSP00000257552	Negative
ENSP00000331915	Negative
ENSP00000329995	Negative
ENSP00000261407	Negative
ENSP00000388942	Negative
ENSP00000307159	Negative
ENSP00000436901	Negative
ENSP00000347979	Negative
ENSP00000339428	Negative
ENSP00000354340	Negative
ENSP00000355895	Negative
ENSP00000415900	Negative
ENSP00000370839	Negative
ENSP00000295131	Negative
ENSP00000368005	Negative
ENSP00000393154	Negative
ENSP00000385143	Negative
ENSP00000381104	Negative
ENSP00000299882	Negative
ENSP00000291295	Negative
ENSP00000296468	Negative
ENSP00000350874	Negative
ENSP00000340988	Negative
ENSP00000468720	Negative
ENSP00000335357	Negative
ENSP00000336842	Negative
ENSP00000359534	Negative
ENSP00000357823	Negative
ENSP00000360690	Negative
ENSP00000242719	Negative
ENSP00000301200	Negative
ENSP00000338812	Negative
ENSP00000250244	Negative
ENSP00000330199	Negative
ENSP00000361084	Negative
ENSP00000279027	Negative
ENSP00000358719	Negative
ENSP00000401966	Negative
ENSP00000409463	Negative
ENSP00000301327	Negative
ENSP00000297012	Negative
ENSP00000316518	Negative
ENSP00000364627	Negative
ENSP00000346627	Negative
ENSP00000302297	Negative
ENSP00000304930	Negative
ENSP00000265993	Negative
ENSP00000339467	Negative
ENSP00000311492	Negative
ENSP00000247668	Negative
ENSP00000040663	Negative
ENSP00000338185	Negative
ENSP00000293379	Negative
ENSP00000342924	Negative
ENSP00000343709	Negative
ENSP00000310723	Negative
ENSP00000362639	Negative
ENSP00000357156	Negative
ENSP00000394178	Negative
ENSP00000403293	Negative
ENSP00000261835	Negative
ENSP00000335560	Negative
ENSP00000250018	Negative
ENSP00000356574	Negative
ENSP00000349577	Negative
ENSP00000380033	Negative
ENSP00000325738	Negative
ENSP00000300773	Negative
ENSP00000271555	Negative
ENSP00000315659	Negative
ENSP00000341657	Negative
ENSP00000317891	Negative
ENSP00000325561	Negative
ENSP00000381428	Negative
ENSP00000277746	Negative
ENSP00000298229	Negative
ENSP00000356311	Negative
ENSP00000349085	Negative
ENSP00000281772	Negative
ENSP00000271883	Negative
ENSP00000379503	Negative
ENSP00000315182	Negative
ENSP00000309439	Negative
ENSP00000399511	Negative
ENSP00000298231	Negative
ENSP00000297591	Negative
ENSP00000340943	Negative
ENSP00000253144	Negative
ENSP00000294189	Negative
ENSP00000242104	Negative
ENSP00000337500	Negative
ENSP00000243326	Negative
ENSP00000340292	Negative
ENSP00000227474	Negative
ENSP00000377969	Negative
ENSP00000266000	Negative
ENSP00000240874	Negative
ENSP00000311778	Negative
ENSP00000383333	Negative
ENSP00000305255	Negative
ENSP00000379823	Negative
ENSP00000075120	Negative
ENSP00000300417	Negative
ENSP00000381566	Negative
ENSP00000302629	Negative
ENSP00000369460	Negative
ENSP00000307275	Negative
ENSP00000295987	Negative
ENSP00000419362	Negative
ENSP00000398704	Negative
ENSP00000356985	Negative
ENSP00000410943	Negative
ENSP00000348786	Negative
ENSP00000397911	Negative
ENSP00000395629	Negative
ENSP00000265316	Negative
ENSP00000271532	Negative
ENSP00000283946	Negative
ENSP00000369442	Negative
ENSP00000411099	Negative
ENSP00000321455	Negative
ENSP00000265062	Negative
ENSP00000239940	Negative
ENSP00000357900	Negative
ENSP00000355923	Negative
ENSP00000347003	Negative
ENSP00000418193	Negative
ENSP00000273390	Negative
ENSP00000215939	Negative
ENSP00000265741	Negative
ENSP00000401706	Negative
ENSP00000334300	Negative
ENSP00000371929	Negative
ENSP00000316339	Negative
ENSP00000347277	Negative
ENSP00000335437	Negative
ENSP00000357739	Negative
ENSP00000351141	Negative
ENSP00000381549	Negative
ENSP00000262752	Negative
ENSP00000316377	Negative
ENSP00000455643	Negative
ENSP00000431822	Negative
ENSP00000402153	Negative
ENSP00000263160	Negative
ENSP00000363512	Negative
ENSP00000356969	Negative
ENSP00000257789	Negative
ENSP00000278742	Negative
ENSP00000312250	Negative
ENSP00000329471	Negative
ENSP00000359240	Negative
ENSP00000417378	Negative
ENSP00000289361	Negative
ENSP00000257215	Negative
ENSP00000361927	Negative
ENSP00000274979	Negative
ENSP00000381030	Negative
ENSP00000437464	Negative
ENSP00000378710	Negative
ENSP00000353542	Negative
ENSP00000309230	Negative
ENSP00000345667	Negative
ENSP00000006658	Negative
ENSP00000263125	Negative
ENSP00000361177	Negative
ENSP00000284637	Negative
ENSP00000219478	Negative
ENSP00000343023	Negative
ENSP00000261023	Negative
ENSP00000261880	Negative
ENSP00000301093	Negative
ENSP00000346916	Negative
ENSP00000372547	Negative
ENSP00000346560	Negative
ENSP00000249330	Negative
ENSP00000290649	Negative
ENSP00000244426	Negative
ENSP00000264790	Negative
ENSP00000344259	Negative
ENSP00000410545	Negative
ENSP00000357475	Negative
ENSP00000356015	Negative
ENSP00000198767	Negative
ENSP00000181839	Negative
ENSP00000295571	Negative
ENSP00000290943	Negative
ENSP00000398880	Negative
ENSP00000301887	Negative
ENSP00000382688	Negative
ENSP00000417496	Negative
ENSP00000219599	Negative
ENSP00000258534	Negative
ENSP00000251089	Negative
ENSP00000311436	Negative
ENSP00000330381	Negative
ENSP00000346127	Negative
ENSP00000368496	Negative
ENSP00000364815	Negative
ENSP00000379946	Negative
ENSP00000216492	Negative
ENSP00000368682	Negative
ENSP00000222145	Negative
ENSP00000332340	Negative
ENSP00000362824	Negative
ENSP00000304292	Negative
ENSP00000295367	Negative
ENSP00000264051	Negative
ENSP00000364567	Negative
ENSP00000328973	Negative
ENSP00000301634	Negative
ENSP00000363139	Negative
ENSP00000258526	Negative
ENSP00000304501	Negative
ENSP00000270257	Negative
ENSP00000366488	Negative
ENSP00000276211	Negative
ENSP00000236979	Negative
ENSP00000342385	Negative
ENSP00000229195	Negative
ENSP00000343943	Negative
ENSP00000330658	Negative
ENSP00000335636	Negative
ENSP00000339659	Negative
ENSP00000283027	Negative
ENSP00000216500	Negative
ENSP00000306003	Negative
ENSP00000217456	Negative
ENSP00000005558	Negative
ENSP00000216468	Negative
ENSP00000262765	Negative
ENSP00000359052	Negative
ENSP00000379866	Negative
ENSP00000359095	Negative
ENSP00000251607	Negative
ENSP00000361185	Negative
ENSP00000360882	Negative
ENSP00000250111	Negative
ENSP00000332756	Negative
ENSP00000454303	Negative
ENSP00000366372	Negative
ENSP00000261211	Negative
ENSP00000261196	Negative
ENSP00000441269	Negative
ENSP00000319829	Negative
ENSP00000261893	Negative
ENSP00000430432	Negative
ENSP00000268231	Negative
ENSP00000360621	Negative
ENSP00000297512	Negative
ENSP00000359504	Negative
ENSP00000344551	Negative
ENSP00000391664	Negative
ENSP00000456533	Negative
ENSP00000280871	Negative
ENSP00000266269	Negative
ENSP00000391944	Negative
ENSP00000254624	Negative
ENSP00000296026	Negative
ENSP00000365063	Negative
ENSP00000263867	Negative
ENSP00000365256	Negative
ENSP00000346694	Negative
ENSP00000253110	Negative
ENSP00000331385	Negative
ENSP00000239316	Negative
ENSP00000312066	Negative
ENSP00000357799	Negative
ENSP00000293406	Negative
ENSP00000247270	Negative
ENSP00000275198	Negative
ENSP00000325929	Negative
ENSP00000366581	Negative
ENSP00000246071	Negative
ENSP00000295087	Negative
ENSP00000410769	Negative
ENSP00000337838	Negative
ENSP00000272139	Negative
ENSP00000264229	Negative
ENSP00000311202	Negative
ENSP00000230990	Negative
ENSP00000378897	Negative
ENSP00000357348	Negative
ENSP00000288111	Negative
ENSP00000339527	Negative
ENSP00000269095	Negative
ENSP00000300213	Negative
ENSP00000283905	Negative
ENSP00000347507	Negative
ENSP00000301653	Negative
ENSP00000020926	Negative
ENSP00000329684	Negative
ENSP00000370003	Negative
ENSP00000363999	Negative
ENSP00000386962	Negative
ENSP00000357794	Negative
ENSP00000203407	Negative
ENSP00000327611	Negative
ENSP00000262039	Negative
ENSP00000358327	Negative
ENSP00000284669	Negative
ENSP00000390158	Negative
ENSP00000324897	Negative
ENSP00000315925	Negative
ENSP00000361943	Negative
ENSP00000256379	Negative
ENSP00000160740	Negative
ENSP00000320957	Negative
ENSP00000377980	Negative
ENSP00000314196	Negative
ENSP00000227251	Negative
ENSP00000283122	Negative
ENSP00000357012	Negative
ENSP00000349689	Negative
ENSP00000362987	Negative
ENSP00000329243	Negative
ENSP00000287585	Negative
ENSP00000309052	Negative
ENSP00000009041	Negative
ENSP00000334767	Negative
ENSP00000259938	Negative
ENSP00000263525	Negative
ENSP00000383023	Negative
ENSP00000273353	Negative
ENSP00000393889	Negative
ENSP00000370736	Negative
ENSP00000247153	Negative
ENSP00000402257	Negative
ENSP00000371376	Negative
ENSP00000301050	Negative
ENSP00000360381	Negative
ENSP00000263563	Negative
ENSP00000300069	Negative
ENSP00000211287	Negative
ENSP00000334458	Negative
ENSP00000258439	Negative
ENSP00000372155	Negative
ENSP00000255305	Negative
ENSP00000265174	Negative
ENSP00000355865	Negative
ENSP00000044462	Negative
ENSP00000420182	Negative
ENSP00000365019	Negative
ENSP00000236980	Negative
ENSP00000454268	Negative
ENSP00000311127	Negative
ENSP00000320434	Negative
ENSP00000406546	Negative
ENSP00000229771	Negative
ENSP00000260983	Negative
ENSP00000281961	Negative
ENSP00000239374	Negative
ENSP00000393559	Negative
ENSP00000429430	Negative
ENSP00000328187	Negative
ENSP00000256104	Negative
ENSP00000291934	Negative
ENSP00000259608	Negative
ENSP00000256649	Negative
ENSP00000225276	Negative
ENSP00000336861	Negative
ENSP00000360269	Negative
ENSP00000349884	Negative
ENSP00000262746	Negative
ENSP00000419485	Negative
ENSP00000206513	Negative
ENSP00000258052	Negative
ENSP00000355396	Negative
ENSP00000281154	Negative
ENSP00000357040	Negative
ENSP00000360247	Negative
ENSP00000367197	Negative
ENSP00000325326	Negative
ENSP00000215957	Negative
ENSP00000341963	Negative
ENSP00000462701	Negative
ENSP00000274711	Negative
ENSP00000341165	Negative
ENSP00000296518	Negative
ENSP00000401310	Negative
ENSP00000299367	Negative
ENSP00000327583	Negative
ENSP00000283256	Negative
ENSP00000400365	Negative
ENSP00000375829	Negative
ENSP00000373195	Negative
ENSP00000261739	Negative
ENSP00000397157	Negative
ENSP00000348657	Negative
ENSP00000343318	Negative
ENSP00000444565	Negative
ENSP00000394071	Negative
ENSP00000314914	Negative
ENSP00000290401	Negative
ENSP00000342148	Negative
ENSP00000360116	Negative
ENSP00000227065	Negative
ENSP00000309968	Negative
ENSP00000276692	Negative
ENSP00000276651	Negative
ENSP00000370741	Negative
ENSP00000363799	Negative
ENSP00000360540	Negative
ENSP00000237527	Negative
ENSP00000360541	Negative
ENSP00000282026	Negative
ENSP00000367030	Negative
ENSP00000223061	Negative
ENSP00000299427	Negative
ENSP00000361700	Negative
ENSP00000297579	Negative
ENSP00000296255	Negative
ENSP00000237449	Negative
ENSP00000267984	Negative
ENSP00000340347	Negative
ENSP00000245451	Negative
ENSP00000299155	Negative
ENSP00000326804	Negative
ENSP00000363136	Negative
ENSP00000372689	Negative
ENSP00000354201	Negative
ENSP00000332772	Negative
ENSP00000311318	Negative
ENSP00000226021	Negative
ENSP00000295454	Negative
ENSP00000361626	Negative
ENSP00000365730	Negative
ENSP00000351052	Negative
ENSP00000265728	Negative
ENSP00000422769	Negative
ENSP00000360828	Negative
ENSP00000295641	Negative
ENSP00000255499	Negative
ENSP00000313021	Negative
ENSP00000354526	Negative
ENSP00000264029	Negative
ENSP00000318016	Negative
ENSP00000378368	Negative
ENSP00000356379	Negative
ENSP00000384683	Negative
ENSP00000354468	Negative
ENSP00000317144	Negative
ENSP00000356410	Negative
ENSP00000321856	Negative
ENSP00000310873	Negative
ENSP00000264160	Negative
ENSP00000216180	Negative
ENSP00000356256	Negative
ENSP00000352671	Negative
ENSP00000255224	Negative
ENSP00000384563	Negative
ENSP00000391942	Negative
ENSP00000346335	Negative
ENSP00000352358	Negative
ENSP00000297268	Negative
ENSP00000337103	Negative
ENSP00000434676	Negative
ENSP00000384801	Negative
ENSP00000362746	Negative
ENSP00000382595	Negative
ENSP00000323856	Negative
ENSP00000384880	Negative
ENSP00000376432	Negative
ENSP00000266581	Negative
ENSP00000312158	Negative
ENSP00000359385	Negative
ENSP00000314518	Negative
ENSP00000338477	Negative
ENSP00000253856	Negative
ENSP00000271835	Negative
ENSP00000261884	Negative
ENSP00000380087	Negative
ENSP00000373274	Negative
ENSP00000263734	Negative
ENSP00000267460	Negative
ENSP00000215754	Negative
ENSP00000217893	Negative
ENSP00000342356	Negative
ENSP00000452780	Negative
ENSP00000261615	Negative
ENSP00000263956	Negative
ENSP00000307006	Negative
ENSP00000433361	Negative
ENSP00000405708	Negative
ENSP00000318986	Negative
ENSP00000316053	Negative
ENSP00000365693	Negative
ENSP00000354490	Negative
ENSP00000332766	Negative
ENSP00000359398	Negative
ENSP00000254260	Negative
ENSP00000401566	Negative
ENSP00000402389	Negative
ENSP00000347538	Negative
ENSP00000334851	Negative
ENSP00000271732	Negative
ENSP00000313875	Negative
ENSP00000231790	Negative
ENSP00000312734	Negative
ENSP00000246785	Negative
ENSP00000340841	Negative
ENSP00000350418	Negative
ENSP00000289575	Negative
ENSP00000260257	Negative
ENSP00000321797	Negative
ENSP00000321077	Negative
ENSP00000314910	Negative
ENSP00000375682	Negative
ENSP00000264917	Negative
ENSP00000368119	Negative
ENSP00000451792	Negative
ENSP00000308082	Negative
ENSP00000332750	Negative
ENSP00000299299	Negative
ENSP00000451261	Negative
ENSP00000405926	Negative
ENSP00000317686	Negative
ENSP00000012443	Negative
ENSP00000373354	Negative
ENSP00000283635	Negative
ENSP00000336740	Negative
ENSP00000387694	Negative
ENSP00000360316	Negative
ENSP00000429243	Negative
ENSP00000373734	Negative
ENSP00000055682	Negative
ENSP00000339637	Negative
ENSP00000333018	Negative
ENSP00000389427	Negative
ENSP00000300403	Negative
ENSP00000305442	Negative
ENSP00000311165	Negative
ENSP00000421315	Negative
ENSP00000371347	Negative
ENSP00000378784	Negative
ENSP00000282382	Negative
ENSP00000301057	Negative
ENSP00000305204	Negative
ENSP00000317721	Negative
ENSP00000386105	Negative
ENSP00000299237	Negative
ENSP00000266735	Negative
ENSP00000384370	Negative
ENSP00000295321	Negative
ENSP00000362123	Negative
ENSP00000357402	Negative
ENSP00000222345	Negative
ENSP00000433757	Negative
ENSP00000360371	Negative
ENSP00000315152	Negative
ENSP00000467676	Negative
ENSP00000355672	Negative
ENSP00000343463	Negative
ENSP00000263182	Negative
ENSP00000303599	Negative
ENSP00000371054	Negative
ENSP00000359818	Negative
ENSP00000428281	Negative
ENSP00000218721	Negative
ENSP00000375777	Negative
ENSP00000418897	Negative
ENSP00000320940	Negative
ENSP00000221399	Negative
ENSP00000348429	Negative
ENSP00000369317	Negative
ENSP00000379387	Negative
ENSP00000233735	Negative
ENSP00000354932	Negative
ENSP00000311320	Negative
ENSP00000269127	Negative
ENSP00000415517	Negative
ENSP00000299752	Negative
ENSP00000378529	Negative
ENSP00000420821	Negative
ENSP00000318197	Negative
ENSP00000228740	Negative
ENSP00000409316	Negative
ENSP00000314484	Negative
ENSP00000341911	Negative
ENSP00000264218	Negative
ENSP00000301972	Negative
ENSP00000377941	Negative
ENSP00000267540	Negative
ENSP00000349588	Negative
ENSP00000419457	Negative
ENSP00000268035	Negative
ENSP00000335261	Negative
ENSP00000358956	Negative
ENSP00000278826	Negative
ENSP00000356143	Negative
ENSP00000334996	Negative
ENSP00000374280	Negative
ENSP00000336627	Negative
ENSP00000321703	Negative
ENSP00000455911	Negative
ENSP00000369162	Negative
ENSP00000003100	Negative
ENSP00000217043	Negative
ENSP00000348527	Negative
ENSP00000292879	Negative
ENSP00000332643	Negative
ENSP00000321049	Negative
ENSP00000328325	Negative
ENSP00000340465	Negative
ENSP00000245479	Negative
ENSP00000355082	Negative
ENSP00000264245	Negative
ENSP00000434359	Negative
ENSP00000296043	Negative
ENSP00000305702	Negative
ENSP00000337854	Negative
ENSP00000335447	Negative
ENSP00000014914	Negative
ENSP00000261047	Negative
ENSP00000251595	Negative
ENSP00000365811	Negative
ENSP00000301917	Negative
ENSP00000362131	Negative
ENSP00000343635	Negative
ENSP00000351740	Negative
ENSP00000294507	Negative
ENSP00000312435	Negative
ENSP00000362103	Negative
ENSP00000369559	Negative
ENSP00000369531	Negative
ENSP00000365198	Negative
ENSP00000344549	Negative
ENSP00000289416	Negative
ENSP00000314544	Negative
ENSP00000352162	Negative
ENSP00000354734	Negative
ENSP00000342144	Negative
ENSP00000361777	Negative
ENSP00000382675	Negative
ENSP00000462972	Negative
ENSP00000345773	Negative
ENSP00000307525	Negative
ENSP00000220496	Negative
ENSP00000300249	Negative
[truncated: 15,669 more rows]
