# Supplementary material for: Computational Approach to Investigating Key GO Terms and KEGG Pathways Associated with CNV
Source: Biomed Res Int. 2018 Apr 11;2018:8406857. doi: 10.1155/2018/8406857 (PMC5925134; doi:10.1155/2018/8406857)
Supplement: Supplementary Materials — The supplementary materials consist of two files. Supplementary Material S1: positive and negative samples in the dataset represented by their gene symbols. Supplementary Material S2: MaxRel feature list as an output of the mRMR method with ranked 20,983 features. [file 8406857.f1.zip › 8406857.f2.xlsx]

## Sheet: Sheet1
Feature name	MI value	Rank
GO:0031091	0.003	1
GO:0031093	0.003	2
GO:0060205	0.003	3
GO:0038133	0.003	4
GO:0038129	0.003	5
GO:1902847	0.003	6
GO:0061517	0.003	7
GO:1902949	0.003	8
GO:0061518	0.003	9
GO:0031983	0.003	10
GO:0005576	0.003	11
GO:0035767	0.003	12
GO:0002580	0.003	13
GO:0044421	0.003	14
GO:0007603	0.003	15
GO:0001948	0.003	16
GO:0072562	0.003	17
GO:0044650	0.003	18
GO:0019062	0.003	19
GO:0010466	0.003	20
GO:0009584	0.003	21
GO:0010951	0.003	22
GO:0001654	0.003	23
GO:0002581	0.003	24
GO:0052547	0.003	25
GO:0052548	0.003	26
GO:0005791	0.003	27
GO:0050839	0.003	28
GO:0071307	0.003	29
GO:1902430	0.003	30
GO:0005604	0.003	31
GO:0030023	0.003	32
GO:2000768	0.003	33
GO:1903002	0.003	34
GO:1903000	0.003	35
GO:1903001	0.003	36
GO:1902951	0.003	37
GO:1902999	0.003	38
GO:1901627	0.003	39
GO:2001139	0.003	40
GO:0046911	0.003	41
GO:0030574	0.003	42
GO:0007423	0.003	43
GO:0001968	0.003	44
GO:0051346	0.003	45
GO:0035583	0.002	46
GO:0008191	0.002	47
GO:0048551	0.002	48
GO:0043537	0.002	49
GO:1990379	0.002	50
GO:1904209	0.002	51
GO:1904207	0.002	52
GO:0097435	0.002	53
GO:1902998	0.002	54
GO:0050840	0.002	55
GO:0044243	0.002	56
GO:1902988	0.002	57
GO:1902947	0.002	58
GO:1902996	0.002	59
GO:0002020	0.002	60
GO:0005788	0.002	61
GO:0045861	0.002	62
GO:1902992	0.002	63
GO:0014012	0.002	64
GO:0030162	0.002	65
GO:0005615	0.002	66
GO:0002576	0.002	67
GO:0034117	0.002	68
GO:0034118	0.002	69
GO:0034120	0.002	70
GO:0050818	0.002	71
GO:1901628	0.002	72
GO:0061134	0.002	73
GO:0005178	0.002	74
GO:0043062	0.002	75
GO:0030395	0.002	76
GO:0030198	0.002	77
GO:1904037	0.002	78
GO:0071692	0.002	79
GO:0071694	0.002	80
GO:0002605	0.002	81
GO:0010754	0.002	82
GO:0002776	0.002	83
GO:0002779	0.002	84
GO:0060156	0.002	85
GO:0010232	0.002	86
GO:1903763	0.002	87
GO:0010652	0.002	88
GO:0010645	0.002	89
GO:0086075	0.002	90
GO:0003294	0.002	91
GO:0003433	0.002	92
GO:0061041	0.002	93
GO:0034774	0.002	94
GO:1901626	0.002	95
GO:0034284	0.002	96
GO:1904188	0.002	97
GO:1904187	0.002	98
GO:0044420	0.002	99
GO:0048592	0.002	100
GO:0006775	0.002	101
GO:2000296	0.002	102
GO:0001523	0.002	103
GO:0003169	0.002	104
GO:1902882	0.002	105
GO:1903034	0.002	106
GO:0009416	0.002	107
GO:0009743	0.002	108
GO:0016101	0.002	109
GO:0001937	0.002	110
GO:0009582	0.002	111
GO:0072274	0.002	112
GO:0035582	0.002	113
GO:0030199	0.002	114
GO:0010711	0.002	115
GO:0060310	0.002	116
GO:0060311	0.002	117
GO:0014843	0.002	118
GO:0060948	0.002	119
GO:0051045	0.002	120
GO:0043394	0.002	121
GO:0007584	0.002	122
GO:0022617	0.002	123
GO:1901681	0.002	124
GO:0032805	0.002	125
GO:0006953	0.002	126
GO:0046686	0.002	127
GO:0031012	0.002	128
GO:0048677	0.002	129
GO:0048682	0.002	130
GO:0051918	0.002	131
GO:0010576	0.002	132
GO:1990523	0.002	133
GO:0050750	0.002	134
GO:0046813	0.002	135
GO:1902966	0.002	136
GO:1902965	0.002	137
GO:1904683	0.002	138
GO:1904684	0.002	139
GO:0090370	0.002	140
GO:0034769	0.002	141
GO:0031667	0.002	142
GO:0010757	0.002	143
GO:1902994	0.002	144
GO:1902995	0.002	145
GO:0001101	0.002	146
GO:0010643	0.002	147
GO:2000181	0.002	148
GO:0033626	0.002	149
GO:0032101	0.002	150
GO:0090261	0.002	151
GO:0005539	0.002	152
GO:1900221	0.002	153
GO:0072136	0.002	154
GO:0072135	0.002	155
GO:0009991	0.002	156
GO:0060249	0.002	157
GO:0035025	0.002	158
GO:0071682	0.002	159
GO:0030141	0.002	160
GO:0031982	0.002	161
GO:0031988	0.002	162
GO:0046086	0.002	163
GO:1901631	0.002	164
GO:0016264	0.002	165
GO:0007602	0.002	166
GO:0042470	0.002	167
GO:0048770	0.002	168
GO:0005775	0.002	169
GO:1902952	0.002	170
GO:1902950	0.002	171
GO:0005584	0.002	172
GO:2001028	0.002	173
GO:1902042	0.002	174
GO:2000353	0.002	175
GO:2001201	0.002	176
GO:2001202	0.002	177
GO:0038044	0.002	178
GO:0043202	0.002	179
GO:0097205	0.002	180
GO:0009986	0.002	181
GO:0001861	0.002	182
GO:0004877	0.002	183
GO:0002088	0.002	184
GO:1900005	0.002	185
GO:1902573	0.002	186
GO:0060982	0.002	187
GO:0010952	0.002	188
GO:0043200	0.002	189
GO:1903570	0.002	190
GO:1903572	0.002	191
GO:0002575	0.002	192
GO:0045103	0.002	193
GO:0005518	0.002	194
GO:0001569	0.002	195
GO:0045104	0.002	196
GO:0015891	0.002	197
GO:0015688	0.002	198
GO:0009314	0.002	199
GO:1902946	0.002	200
GO:0045429	0.002	201
GO:1904407	0.002	202
GO:0003094	0.002	203
GO:0003051	0.002	204
GO:1904235	0.002	205
GO:1904237	0.002	206
GO:0001894	0.002	207
GO:0048593	0.002	208
GO:1904181	0.002	209
GO:0000060	0.002	210
GO:0005577	0.002	211
GO:1902993	0.002	212
GO:1902004	0.002	213
GO:2001026	0.002	214
GO:0001936	0.002	215
GO:0048545	0.002	216
GO:0070613	0.002	217
GO:0060541	0.002	218
GO:0061419	0.002	219
GO:1903317	0.002	220
GO:0043260	0.002	221
GO:0009746	0.002	222
GO:0070051	0.002	223
GO:0051917	0.002	224
GO:0006931	0.002	225
GO:0009725	0.002	226
GO:0035672	0.002	227
GO:0009581	0.002	228
GO:0032803	0.002	229
GO:0032802	0.002	230
GO:0061045	0.002	231
GO:0060739	0.002	232
GO:0002523	0.002	233
GO:0002041	0.002	234
GO:1902170	0.002	235
GO:0044855	0.002	236
GO:0044858	0.002	237
GO:1903906	0.002	238
GO:0044856	0.002	239
GO:0014910	0.002	240
GO:0006898	0.002	241
GO:0035692	0.002	242
GO:0010477	0.002	243
GO:0014070	0.002	244
GO:0097305	0.002	245
hsa04512	0.002	246
GO:0097084	0.002	247
GO:0048407	0.002	248
GO:0032963	0.002	249
GO:0051384	0.002	250
GO:0001525	0.002	251
GO:0030324	0.002	252
GO:0005578	0.002	253
GO:0072132	0.002	254
GO:0030323	0.002	255
GO:1900407	0.002	256
GO:0044433	0.002	257
GO:0005796	0.002	258
GO:0048661	0.002	259
GO:0033031	0.002	260
GO:1903598	0.002	261
GO:0036021	0.002	262
GO:0048659	0.002	263
GO:0048660	0.002	264
GO:0032964	0.002	265
GO:0009887	0.002	266
GO:0001855	0.002	267
GO:0031960	0.002	268
GO:0044406	0.002	269
GO:0070325	0.002	270
GO:0044259	0.002	271
GO:0050820	0.002	272
GO:0003912	0.002	273
GO:0045603	0.002	274
GO:0005608	0.002	275
GO:0045957	0.002	276
GO:0030451	0.002	277
GO:0042159	0.002	278
GO:0030056	0.002	279
GO:0065008	0.002	280
GO:0010712	0.002	281
GO:0031668	0.002	282
GO:0006196	0.002	283
GO:0044246	0.002	284
GO:0031669	0.002	285
GO:2000179	0.002	286
GO:0045178	0.002	287
GO:0032847	0.002	288
GO:0043183	0.002	289
GO:0097066	0.002	290
GO:0071230	0.002	291
GO:1902336	0.002	292
GO:0038189	0.002	293
GO:0038190	0.002	294
GO:0060309	0.002	295
GO:0060442	0.002	296
GO:0043236	0.002	297
GO:0000302	0.002	298
GO:0099503	0.002	299
GO:0045667	0.002	300
GO:0014002	0.002	301
GO:0044092	0.002	302
GO:0050431	0.002	303
GO:0071062	0.002	304
GO:0006979	0.002	305
GO:1901343	0.002	306
hsa05144	0.002	307
GO:0042743	0.002	308
GO:1903035	0.002	309
GO:0048662	0.002	310
GO:1900745	0.002	311
GO:0048553	0.002	312
GO:0030278	0.002	313
GO:0035295	0.002	314
GO:0030850	0.002	315
GO:0051897	0.002	316
GO:0043277	0.002	317
GO:0044236	0.002	318
GO:0009611	0.002	319
GO:0034698	0.002	320
GO:0036072	0.002	321
GO:0001957	0.002	322
GO:0044548	0.002	323
GO:1903903	0.002	324
GO:0007568	0.002	325
GO:0014823	0.002	326
GO:0046532	0.002	327
GO:0042493	0.002	328
GO:1904205	0.002	329
GO:0060588	0.002	330
GO:2000405	0.002	331
GO:2000379	0.002	332
GO:0048732	0.002	333
GO:0045807	0.002	334
GO:0001649	0.002	335
GO:0060429	0.002	336
GO:0006809	0.002	337
GO:0097113	0.002	338
GO:0097688	0.002	339
GO:0046890	0.002	340
GO:0045428	0.002	341
GO:0061156	0.002	342
GO:0035239	0.002	343
hsa04610	0.002	344
GO:0001953	0.002	345
GO:0001501	0.002	346
GO:0048050	0.002	347
GO:0034599	0.002	348
GO:0001503	0.002	349
GO:0008201	0.002	350
GO:0070625	0.002	351
GO:0051043	0.002	352
GO:0007566	0.002	353
GO:0014074	0.002	354
GO:0001889	0.002	355
GO:0032965	0.002	356
GO:0072001	0.002	357
GO:0097242	0.002	358
GO:1901630	0.002	359
GO:0071310	0.002	360
GO:0009583	0.002	361
GO:0009629	0.002	362
GO:0048030	0.002	363
GO:1900046	0.002	364
GO:0030193	0.002	365
GO:0072733	0.002	366
GO:0072734	0.002	367
GO:1903428	0.002	368
GO:0030282	0.002	369
GO:1903426	0.002	370
GO:0030501	0.002	371
GO:0010755	0.002	372
GO:0010039	0.002	373
GO:2000117	0.002	374
GO:0002009	0.002	375
GO:1901890	0.002	376
GO:0060767	0.002	377
GO:0004720	0.002	378
GO:0002578	0.002	379
GO:0050930	0.002	380
GO:0072073	0.002	381
GO:0009719	0.002	382
GO:0043154	0.002	383
GO:0048845	0.002	384
GO:0050819	0.002	385
GO:0031856	0.002	386
GO:0031857	0.002	387
GO:1901201	0.002	388
GO:0032967	0.002	389
GO:0044706	0.002	390
GO:0008544	0.002	391
GO:1900047	0.002	392
GO:0030195	0.002	393
GO:0097350	0.002	394
GO:0050678	0.002	395
GO:0014812	0.002	396
GO:0031579	0.002	397
GO:0001822	0.002	398
GO:0022614	0.002	399
GO:0007160	0.002	400
GO:0014909	0.002	401
GO:0048552	0.002	402
GO:0010710	0.002	403
GO:0071241	0.002	404
GO:0072376	0.002	405
GO:0045778	0.002	406
GO:0060526	0.002	407
GO:0060527	0.002	408
GO:0008347	0.002	409
GO:0071495	0.002	410
GO:1903055	0.002	411
GO:0048520	0.002	412
GO:0051241	0.002	413
GO:0001846	0.002	414
GO:0051901	0.002	415
GO:0003104	0.002	416
GO:2000351	0.002	417
GO:0014911	0.002	418
GO:0060572	0.002	419
GO:2000378	0.002	420
GO:0035691	0.002	421
GO:0090323	0.002	422
GO:0016862	0.002	423
GO:0050178	0.002	424
GO:0061078	0.002	425
GO:1901629	0.002	426
GO:0001540	0.002	427
GO:0005912	0.002	428
GO:1902618	0.002	429
GO:0006897	0.002	430
GO:0009790	0.002	431
GO:0042744	0.002	432
GO:0033676	0.002	433
GO:0048646	0.002	434
GO:0055123	0.002	435
GO:0007417	0.002	436
GO:0001568	0.002	437
GO:0071407	0.002	438
GO:0043534	0.002	439
GO:0043068	0.002	440
GO:0009749	0.002	441
GO:0060571	0.002	442
GO:0001944	0.002	443
GO:0030984	0.002	444
GO:2000098	0.002	445
GO:0006956	0.002	446
GO:0033993	0.002	447
GO:0048569	0.002	448
GO:0071214	0.002	449
GO:0060462	0.002	450
GO:0001655	0.002	451
GO:0022610	0.002	452
GO:0060463	0.002	453
GO:0007155	0.002	454
GO:0006721	0.002	455
GO:0016023	0.002	456
GO:0009585	0.002	457
GO:0010017	0.002	458
GO:0016037	0.002	459
GO:0071489	0.002	460
GO:0009639	0.002	461
GO:0016038	0.002	462
GO:0001868	0.002	463
GO:0001869	0.002	464
GO:0032571	0.002	465
GO:0048514	0.002	466
GO:0071953	0.002	467
GO:0038033	0.002	468
GO:0045834	0.002	469
GO:0043032	0.002	470
GO:0060363	0.002	471
GO:0071732	0.002	472
GO:0004857	0.002	473
GO:0010001	0.002	474
GO:0036293	0.002	475
GO:0097454	0.002	476
GO:0050832	0.002	477
GO:0072359	0.002	478
GO:0072358	0.002	479
GO:0001666	0.002	480
GO:2000521	0.002	481
GO:0043627	0.002	482
GO:0061138	0.002	483
GO:0034683	0.002	484
GO:2000536	0.002	485
GO:0052370	0.002	486
GO:0052522	0.002	487
GO:0052191	0.002	488
GO:0052190	0.002	489
GO:0052231	0.002	490
GO:0052066	0.002	491
GO:0035867	0.002	492
GO:1904035	0.002	493
GO:0016485	0.002	494
GO:0030855	0.002	495
GO:0072563	0.002	496
GO:0042056	0.002	497
GO:0030513	0.002	498
GO:0006509	0.002	499
GO:0036010	0.002	500
GO:0032403	0.002	501
GO:0090303	0.002	502
GO:1900048	0.002	503
GO:0030194	0.002	504
GO:0010594	0.002	505
GO:2000266	0.002	506
GO:0001763	0.002	507
GO:0031102	0.002	508
GO:0046533	0.002	509
GO:0043010	0.002	510
GO:0007507	0.002	511
GO:0033002	0.002	512
GO:0007182	0.002	513
GO:0014839	0.002	514
GO:0048754	0.002	515
GO:0051604	0.002	516
GO:0010727	0.002	517
GO:0098869	0.002	518
GO:0005114	0.002	519
GO:0097067	0.002	520
GO:0009925	0.002	521
GO:0072010	0.002	522
GO:0045471	0.002	523
GO:0002780	0.002	524
GO:0002777	0.002	525
GO:0072311	0.002	526
GO:0032102	0.002	527
GO:0033591	0.002	528
GO:0060768	0.002	529
GO:0042627	0.002	530
GO:0050680	0.002	531
GO:0009268	0.002	532
GO:0031016	0.002	533
GO:0005507	0.002	534
GO:0042063	0.002	535
GO:0051702	0.002	536
GO:0072112	0.002	537
GO:0061318	0.002	538
GO:0033574	0.002	539
GO:0030414	0.002	540
GO:0097017	0.002	541
GO:0071396	0.002	542
GO:0070542	0.002	543
GO:0043281	0.002	544
GO:1990430	0.002	545
GO:0045079	0.002	546
GO:0030100	0.002	547
GO:0016504	0.002	548
GO:0071731	0.002	549
GO:0070242	0.002	550
GO:0010035	0.002	551
GO:0031233	0.002	552
GO:0060538	0.002	553
GO:0060317	0.002	554
GO:1900134	0.002	555
GO:0050999	0.002	556
GO:0043403	0.002	557
GO:0033619	0.002	558
GO:2000698	0.002	559
GO:0015322	0.002	560
GO:0005427	0.002	561
GO:0048511	0.002	562
GO:0010544	0.002	563
GO:0034684	0.002	564
GO:0061135	0.002	565
GO:0042954	0.002	566
GO:0031099	0.002	567
GO:0034205	0.002	568
GO:0001847	0.002	569
GO:0014013	0.002	570
GO:0032808	0.002	571
GO:0031670	0.002	572
GO:0051093	0.002	573
GO:0010721	0.002	574
GO:0004866	0.002	575
GO:0051851	0.002	576
GO:0002651	0.002	577
GO:0002649	0.002	578
GO:1902742	0.002	579
GO:0031018	0.002	580
GO:0046716	0.002	581
GO:2000026	0.002	582
GO:1900138	0.002	583
GO:0004064	0.002	584
GO:0009612	0.002	585
GO:0051961	0.002	586
GO:0030185	0.002	587
GO:0006929	0.002	588
GO:0031232	0.002	589
GO:0002052	0.002	590
GO:0042803	0.002	591
GO:0002906	0.002	592
GO:0002905	0.002	593
GO:0002901	0.002	594
GO:0042562	0.002	595
GO:0072510	0.002	596
GO:0015091	0.002	597
GO:0070365	0.002	598
GO:0051882	0.002	599
GO:0031214	0.002	600
GO:1901342	0.002	601
GO:0042567	0.002	602
GO:0046579	0.002	603
GO:0016942	0.002	604
GO:0036454	0.002	605
GO:1990401	0.002	606
GO:0060683	0.002	607
hsa05323	0.002	608
GO:0060737	0.002	609
GO:0071496	0.002	610
GO:0050768	0.002	611
GO:0051259	0.002	612
GO:0048563	0.002	613
GO:1904244	0.002	614
GO:1904242	0.002	615
GO:1990747	0.002	616
GO:0071253	0.002	617
GO:0042704	0.002	618
GO:0030279	0.002	619
GO:0043524	0.002	620
GO:0061302	0.002	621
GO:0032799	0.002	622
GO:1903409	0.002	623
GO:0032355	0.002	624
GO:0042730	0.002	625
GO:0045765	0.002	626
GO:0050901	0.002	627
GO:0061756	0.002	628
GO:0051050	0.002	629
GO:0050793	0.002	630
GO:0034395	0.002	631
GO:2001189	0.002	632
GO:0002291	0.002	633
GO:2000097	0.002	634
GO:0060279	0.002	635
GO:0035491	0.002	636
GO:0061044	0.002	637
GO:0035490	0.002	638
GO:2000295	0.002	639
GO:0016525	0.002	640
GO:0046683	0.002	641
GO:0034059	0.002	642
GO:0055102	0.002	643
GO:0009636	0.002	644
GO:0007399	0.002	645
GO:0042953	0.002	646
GO:0044872	0.002	647
GO:2000257	0.002	648
GO:2000048	0.002	649
GO:0072203	0.002	650
GO:0070022	0.002	651
GO:0043086	0.002	652
GO:0034405	0.002	653
GO:0008283	0.002	654
GO:0046983	0.002	655
GO:0051896	0.002	656
GO:0010752	0.002	657
GO:0042127	0.002	658
hsa05206	0.002	659
GO:0045595	0.002	660
GO:0030234	0.002	661
GO:0070488	0.002	662
GO:1901654	0.002	663
GO:0045340	0.002	664
GO:0003007	0.002	665
GO:0032374	0.002	666
GO:0032371	0.002	667
GO:2000679	0.002	668
GO:0010935	0.002	669
GO:0051291	0.002	670
GO:0061458	0.002	671
GO:0001895	0.002	672
GO:0048608	0.002	673
GO:0043185	0.002	674
GO:0042802	0.002	675
GO:0072210	0.002	676
GO:0050748	0.002	677
GO:0044085	0.002	678
GO:0014009	0.002	679
GO:0043112	0.002	680
GO:0010288	0.002	681
GO:0050786	0.002	682
GO:0048729	0.002	683
GO:0006915	0.002	684
GO:0001618	0.002	685
GO:0051094	0.002	686
GO:0003382	0.002	687
GO:0048584	0.002	688
GO:0060740	0.002	689
GO:0048627	0.002	690
GO:1904073	0.002	691
GO:1904075	0.002	692
GO:0051248	0.002	693
GO:0001851	0.002	694
GO:0070169	0.002	695
GO:0030449	0.002	696
GO:0048844	0.002	697
GO:0034359	0.002	698
GO:0034360	0.002	699
GO:0090088	0.002	700
GO:2000878	0.002	701
GO:2000880	0.002	702
GO:0042938	0.002	703
GO:2001150	0.002	704
GO:0090089	0.002	705
GO:0035442	0.002	706
GO:2001148	0.002	707
GO:0061008	0.002	708
GO:0070167	0.002	709
GO:0010817	0.002	710
GO:0070412	0.002	711
GO:0036314	0.002	712
GO:2000027	0.002	713
GO:1902721	0.002	714
GO:0010694	0.002	715
GO:0051591	0.002	716
GO:0071281	0.002	717
GO:0045597	0.002	718
GO:0012501	0.002	719
GO:2001234	0.002	720
GO:0060512	0.002	721
GO:0010941	0.002	722
GO:0060284	0.002	723
GO:0050927	0.002	724
GO:1901522	0.002	725
GO:0007618	0.002	726
GO:0097460	0.002	727
GO:0000303	0.002	728
GO:0006026	0.002	729
GO:0016265	0.002	730
GO:0008219	0.002	731
GO:0060687	0.002	732
GO:0010038	0.002	733
GO:2000106	0.002	734
GO:0014734	0.002	735
GO:0044253	0.002	736
GO:0010714	0.002	737
GO:0004667	0.002	738
GO:0072593	0.002	739
GO:0030318	0.002	740
GO:0022612	0.002	741
GO:0006027	0.002	742
GO:0001657	0.002	743
GO:0042981	0.002	744
GO:0043067	0.002	745
GO:0048589	0.002	746
GO:0031638	0.002	747
GO:0051969	0.002	748
GO:0071887	0.002	749
GO:0031646	0.002	750
GO:0009605	0.002	751
GO:0048708	0.002	752
GO:0048583	0.002	753
GO:0070141	0.002	754
GO:0003006	0.002	755
GO:0097493	0.002	756
GO:0072164	0.002	757
GO:0019838	0.002	758
GO:0072163	0.002	759
GO:0051051	0.002	760
GO:0035902	0.002	761
GO:0005026	0.002	762
GO:0050921	0.002	763
GO:0046209	0.002	764
GO:0010720	0.002	765
GO:0048771	0.002	766
GO:0008284	0.002	767
GO:0003197	0.002	768
GO:2001057	0.002	769
GO:0044273	0.002	770
GO:0034443	0.002	771
GO:0090636	0.002	772
GO:0001823	0.002	773
GO:0090637	0.002	774
GO:0040007	0.002	775
GO:2001046	0.002	776
GO:0030510	0.002	777
GO:0042476	0.002	778
GO:1902460	0.002	779
GO:1902462	0.002	780
GO:0071229	0.002	781
GO:0090194	0.002	782
GO:0072125	0.002	783
GO:0060253	0.002	784
GO:2000644	0.002	785
GO:0070161	0.002	786
GO:0070723	0.002	787
GO:0051795	0.002	788
GO:0060562	0.002	789
GO:0030500	0.002	790
GO:0050673	0.002	791
GO:0060441	0.002	792
GO:0033622	0.002	793
GO:0008285	0.002	794
GO:0006887	0.002	795
GO:0035645	0.002	796
GO:0019216	0.002	797
GO:0004962	0.002	798
GO:0086100	0.002	799
GO:0032526	0.002	800
GO:0098592	0.002	801
GO:0050435	0.002	802
GO:1902533	0.002	803
GO:0048565	0.002	804
GO:0060525	0.002	805
GO:1902692	0.002	806
GO:1903408	0.002	807
GO:1903406	0.002	808
GO:0034714	0.002	809
GO:0009158	0.002	810
GO:0009169	0.002	811
GO:2000230	0.002	812
GO:1903053	0.002	813
GO:0004465	0.002	814
GO:0042698	0.002	815
GO:0034686	0.002	816
GO:0005589	0.002	817
GO:0009967	0.002	818
GO:0098647	0.002	819
GO:0005583	0.002	820
GO:0098643	0.002	821
GO:0034614	0.002	822
GO:0014003	0.002	823
GO:0004867	0.002	824
GO:0001300	0.002	825
GO:0046889	0.002	826
GO:0051797	0.002	827
GO:1901863	0.002	828
GO:0003273	0.002	829
GO:2000343	0.002	830
GO:0003401	0.002	831
GO:0021782	0.002	832
GO:0007565	0.002	833
GO:1901215	0.002	834
GO:0010811	0.002	835
GO:0031100	0.002	836
GO:0044087	0.002	837
GO:0002064	0.002	838
GO:0052200	0.002	839
GO:0052173	0.002	840
GO:0075136	0.002	841
GO:0007422	0.002	842
GO:0005201	0.002	843
GO:0048048	0.002	844
GO:0014015	0.002	845
GO:0004566	0.002	846
GO:0007492	0.002	847
GO:0035272	0.002	848
GO:0051216	0.002	849
GO:0007431	0.002	850
GO:0048678	0.002	851
GO:0033625	0.002	852
GO:0071456	0.002	853
GO:0097094	0.002	854
GO:0098772	0.002	855
GO:0010596	0.002	856
GO:0071822	0.002	857
GO:0060039	0.002	858
GO:0035270	0.002	859
GO:0060560	0.002	860
GO:0010046	0.002	861
GO:0010633	0.002	862
GO:1901700	0.002	863
GO:0072089	0.002	864
GO:0090184	0.002	865
GO:0070237	0.002	866
GO:0036066	0.002	867
GO:0030207	0.002	868
GO:0043536	0.002	869
GO:0009609	0.002	870
GO:0009608	0.002	871
GO:0060601	0.002	872
GO:0043588	0.002	873
GO:0043065	0.002	874
GO:0048259	0.002	875
GO:0032956	0.002	876
GO:0070482	0.002	877
GO:0010942	0.002	878
GO:0043184	0.002	879
GO:0010226	0.002	880
GO:0090183	0.002	881
GO:0031077	0.002	882
GO:0008147	0.002	883
GO:0060602	0.002	884
GO:0033197	0.002	885
GO:0005605	0.002	886
GO:0005913	0.002	887
GO:0008160	0.002	888
hsa04350	0.002	889
GO:0023056	0.002	890
GO:0060664	0.002	891
GO:0002003	0.002	892
GO:0071248	0.002	893
GO:0010647	0.002	894
GO:0010463	0.002	895
GO:0033688	0.002	896
GO:0042445	0.002	897
GO:0048585	0.002	898
GO:0043567	0.002	899
GO:1904019	0.002	900
GO:0001707	0.002	901
GO:0051146	0.002	902
GO:0030055	0.002	903
GO:0038089	0.002	904
GO:0098754	0.002	905
GO:0003344	0.002	906
GO:0010906	0.002	907
GO:2000377	0.002	908
GO:0007440	0.002	909
GO:0034332	0.002	910
GO:0005381	0.002	911
GO:0046660	0.002	912
GO:0060324	0.002	913
GO:1901889	0.002	914
GO:0070052	0.002	915
GO:0002076	0.002	916
GO:1990748	0.002	917
GO:0031410	0.002	918
GO:0051246	0.002	919
GO:0035987	0.002	920
GO:0017129	0.002	921
GO:1903596	0.002	922
GO:0061005	0.002	923
GO:0030879	0.002	924
GO:0045665	0.002	925
GO:0034363	0.002	926
GO:0032375	0.002	927
GO:0032372	0.002	928
GO:0034694	0.002	929
GO:0060349	0.002	930
GO:0048286	0.002	931
GO:0032286	0.002	932
GO:0002320	0.002	933
GO:0071141	0.002	934
GO:0032570	0.002	935
GO:1903225	0.002	936
GO:0005925	0.002	937
GO:0048863	0.002	938
GO:0090322	0.002	939
GO:0048709	0.002	940
GO:0042307	0.002	941
GO:0005586	0.002	942
GO:0048701	0.002	943
GO:0033690	0.002	944
GO:0007178	0.002	945
GO:0042246	0.002	946
GO:0097285	0.002	947
GO:0060782	0.002	948
GO:0060783	0.002	949
GO:0060781	0.002	950
GO:0060458	0.002	951
GO:0009949	0.002	952
GO:0080125	0.002	953
GO:0061189	0.002	954
GO:2000356	0.002	955
GO:2000358	0.002	956
GO:2000061	0.002	957
GO:2000357	0.002	958
GO:2000062	0.002	959
GO:0072195	0.002	960
GO:0061190	0.002	961
GO:2000063	0.002	962
GO:0031623	0.002	963
GO:0010810	0.002	964
GO:1903054	0.002	965
GO:0060977	0.002	966
GO:0051883	0.002	967
GO:0051818	0.002	968
GO:0098589	0.002	969
GO:0043589	0.002	970
GO:0000902	0.002	971
GO:0060350	0.002	972
GO:0034329	0.002	973
GO:0098644	0.002	974
GO:0043395	0.002	975
GO:2000401	0.002	976
GO:0060843	0.002	977
GO:0003270	0.002	978
GO:0030450	0.002	979
GO:0045959	0.002	980
GO:0060364	0.002	981
GO:1904591	0.002	982
GO:0002540	0.002	983
GO:0002538	0.002	984
GO:1902041	0.002	985
GO:0045177	0.002	986
GO:1900115	0.002	987
GO:1900116	0.002	988
GO:1901031	0.002	989
GO:0072606	0.002	990
GO:0060041	0.002	991
GO:0006751	0.002	992
GO:0072050	0.002	993
GO:0071559	0.002	994
GO:0032768	0.002	995
GO:0060548	0.002	996
GO:0016337	0.002	997
GO:0050720	0.002	998
GO:2001027	0.002	999
GO:0046668	0.002	1000
GO:0043066	0.002	1001
GO:2001280	0.002	1002
GO:0031394	0.002	1003
GO:0032989	0.002	1004
GO:0061444	0.002	1005
GO:0021943	0.002	1006
GO:0001658	0.002	1007
GO:0098609	0.002	1008
GO:0001938	0.002	1009
GO:0060563	0.002	1010
GO:0070278	0.002	1011
GO:0040008	0.002	1012
GO:0032488	0.002	1013
GO:0001775	0.002	1014
GO:0072378	0.002	1015
GO:0007548	0.002	1016
GO:0043069	0.002	1017
GO:0072006	0.002	1018
GO:0031253	0.002	1019
GO:0004175	0.002	1020
GO:0048705	0.002	1021
GO:0033093	0.002	1022
GO:0008217	0.002	1023
GO:0070627	0.002	1024
GO:0002002	0.002	1025
GO:0060177	0.002	1026
GO:0043152	0.002	1027
GO:1902897	0.002	1028
GO:0002526	0.002	1029
GO:0035662	0.002	1030
GO:0009913	0.002	1031
GO:0071560	0.002	1032
GO:0032368	0.002	1033
GO:0009968	0.002	1034
GO:2000121	0.002	1035
GO:0051546	0.002	1036
GO:0051235	0.002	1037
GO:0008119	0.002	1038
GO:0044877	0.002	1039
GO:0003430	0.002	1040
GO:0018149	0.002	1041
GO:0071709	0.002	1042
GO:0033273	0.002	1043
GO:0005515	0.002	1044
GO:0031580	0.002	1045
GO:0001766	0.002	1046
GO:0023057	0.002	1047
GO:1904888	0.002	1048
GO:0006024	0.002	1049
GO:0045785	0.002	1050
GO:0001837	0.002	1051
GO:0009628	0.002	1052
GO:0006023	0.002	1053
GO:2000643	0.002	1054
GO:0060537	0.002	1055
GO:0045682	0.002	1056
GO:0061440	0.002	1057
GO:0061437	0.002	1058
GO:0007517	0.002	1059
GO:0045444	0.002	1060
GO:0060684	0.002	1061
GO:0016043	0.002	1062
GO:1990267	0.002	1063
GO:0048015	0.002	1064
GO:0098602	0.002	1065
GO:0048017	0.002	1066
GO:0022414	0.002	1067
GO:0006935	0.002	1068
GO:0010770	0.002	1069
GO:0042330	0.002	1070
GO:0051495	0.002	1071
GO:0043652	0.002	1072
GO:0098773	0.002	1073
GO:0006801	0.002	1074
GO:0014706	0.002	1075
GO:0000003	0.002	1076
GO:0036292	0.002	1077
GO:0032870	0.002	1078
GO:0060434	0.002	1079
GO:0048666	0.002	1080
GO:0005138	0.002	1081
GO:0050679	0.002	1082
GO:0002384	0.002	1083
GO:0010955	0.002	1084
GO:0061061	0.002	1085
GO:1903318	0.002	1086
GO:0044702	0.002	1087
GO:0048762	0.002	1088
GO:0060804	0.002	1089
GO:0051042	0.002	1090
GO:0090092	0.002	1091
GO:0051543	0.002	1092
GO:0051545	0.002	1093
GO:0048864	0.002	1094
GO:0007184	0.002	1095
GO:0045923	0.002	1096
GO:0022607	0.002	1097
GO:0009607	0.002	1098
GO:0048871	0.002	1099
GO:0010648	0.002	1100
GO:0070483	0.002	1101
GO:0051701	0.002	1102
GO:2000677	0.002	1103
GO:0042482	0.002	1104
GO:0003081	0.002	1105
GO:0090596	0.002	1106
GO:0060688	0.002	1107
GO:0060008	0.002	1108
GO:0050926	0.002	1109
GO:0031069	0.002	1110
GO:1900738	0.002	1111
GO:0008237	0.002	1112
GO:0048730	0.002	1113
GO:0001942	0.002	1114
GO:0022405	0.002	1115
GO:0022404	0.002	1116
GO:0043206	0.002	1117
GO:0014900	0.002	1118
GO:0070724	0.002	1119
GO:0003307	0.002	1120
hsa05416	0.002	1121
GO:1902531	0.002	1122
GO:0030728	0.002	1123
GO:0014032	0.002	1124
GO:0005174	0.002	1125
GO:0005771	0.002	1126
GO:0010193	0.002	1127
GO:0010646	0.002	1128
GO:0014031	0.002	1129
GO:0061448	0.002	1130
GO:1903510	0.002	1131
GO:0051098	0.002	1132
GO:0004859	0.002	1133
GO:0060485	0.002	1134
GO:0034250	0.002	1135
GO:0010934	0.002	1136
GO:0046688	0.002	1137
GO:0043410	0.002	1138
GO:0042060	0.002	1139
GO:0030030	0.002	1140
GO:0010512	0.002	1141
GO:0005540	0.002	1142
GO:0034504	0.002	1143
hsa05200	0.002	1144
GO:0045664	0.002	1145
GO:1902669	0.002	1146
GO:0048842	0.002	1147
GO:0000305	0.002	1148
GO:0042633	0.002	1149
GO:0042303	0.002	1150
GO:0003093	0.002	1151
GO:0055093	0.002	1152
GO:0036296	0.002	1153
GO:0034616	0.002	1154
GO:0055024	0.002	1155
GO:0065010	0.002	1156
GO:0045540	0.002	1157
GO:0070062	0.002	1158
GO:0048009	0.002	1159
GO:0061304	0.002	1160
GO:0045137	0.002	1161
GO:0031175	0.002	1162
GO:0051900	0.002	1163
GO:0090192	0.002	1164
GO:0035051	0.002	1165
GO:0001706	0.002	1166
GO:0052564	0.002	1167
GO:0052572	0.002	1168
GO:1990667	0.002	1169
GO:0072012	0.002	1170
GO:0045600	0.002	1171
GO:0043568	0.002	1172
GO:0031657	0.002	1173
GO:1902930	0.002	1174
GO:0072144	0.002	1175
GO:0030842	0.002	1176
GO:0045108	0.002	1177
GO:0030844	0.002	1178
GO:0045105	0.002	1179
GO:0045106	0.002	1180
GO:0045596	0.002	1181
GO:0051128	0.002	1182
GO:0031550	0.002	1183
GO:0031548	0.002	1184
GO:0061193	0.002	1185
GO:0032770	0.002	1186
GO:0043230	0.002	1187
GO:1903561	0.002	1188
GO:0033379	0.002	1189
GO:0033375	0.002	1190
GO:0033367	0.002	1191
GO:0033366	0.002	1192
GO:0033377	0.002	1193
GO:0033380	0.002	1194
GO:0033371	0.002	1195
GO:0033373	0.002	1196
GO:0033370	0.002	1197
GO:0033382	0.002	1198
GO:0033368	0.002	1199
GO:0033374	0.002	1200
GO:0016324	0.002	1201
GO:0070053	0.002	1202
GO:0014066	0.002	1203
GO:0031528	0.002	1204
GO:0002673	0.002	1205
GO:0060840	0.002	1206
GO:0005006	0.002	1207
GO:0048144	0.002	1208
GO:0044849	0.002	1209
GO:1901698	0.002	1210
GO:0030038	0.002	1211
GO:0043149	0.002	1212
GO:0070557	0.002	1213
GO:0032148	0.002	1214
GO:0071354	0.002	1215
GO:0048685	0.002	1216
GO:0043271	0.002	1217
GO:0046543	0.002	1218
hsa05215	0.002	1219
GO:0061684	0.002	1220
GO:0031700	0.002	1221
GO:0050766	0.002	1222
GO:0046658	0.002	1223
GO:0014855	0.002	1224
GO:0032231	0.002	1225
GO:0005172	0.002	1226
GO:0051492	0.002	1227
GO:0097192	0.002	1228
GO:0038034	0.002	1229
GO:0030032	0.002	1230
GO:0060351	0.002	1231
GO:2000736	0.002	1232
GO:0007161	0.002	1233
GO:0072202	0.002	1234
GO:0002317	0.002	1235
GO:0030200	0.002	1236
GO:0004666	0.002	1237
GO:0035633	0.002	1238
GO:0046622	0.002	1239
GO:0032224	0.002	1240
GO:0008406	0.002	1241
GO:0060561	0.002	1242
GO:0071364	0.002	1243
GO:0071840	0.002	1244
GO:0010269	0.002	1245
GO:1902003	0.002	1246
GO:0045840	0.002	1247
GO:1904849	0.002	1248
GO:2000546	0.002	1249
hsa05210	0.002	1250
GO:0006710	0.002	1251
GO:0010812	0.002	1252
GO:0032642	0.002	1253
GO:0045216	0.002	1254
GO:0030514	0.002	1255
GO:0030155	0.002	1256
GO:0042116	0.002	1257
GO:0050731	0.002	1258
GO:0065009	0.002	1259
GO:1900084	0.002	1260
GO:0010243	0.002	1261
GO:0034392	0.002	1262
GO:0043516	0.002	1263
GO:0002374	0.002	1264
GO:0051057	0.002	1265
GO:0071638	0.002	1266
GO:0014068	0.002	1267
GO:0003044	0.002	1268
GO:2001237	0.002	1269
GO:0032269	0.002	1270
GO:0007352	0.002	1271
GO:0005588	0.002	1272
GO:0060326	0.002	1273
GO:0072697	0.002	1274
GO:0022603	0.002	1275
GO:0071404	0.002	1276
GO:0043496	0.002	1277
GO:2000177	0.002	1278
GO:0009791	0.002	1279
GO:0051130	0.002	1280
GO:0060390	0.002	1281
GO:0008289	0.002	1282
GO:0035850	0.002	1283
GO:0031639	0.002	1284
GO:0032846	0.002	1285
GO:0097191	0.002	1286
GO:0044437	0.002	1287
GO:0043254	0.002	1288
GO:0051960	0.002	1289
GO:0032835	0.002	1290
GO:0038128	0.002	1291
GO:0072284	0.002	1292
GO:0060754	0.002	1293
GO:0007181	0.002	1294
GO:1900025	0.002	1295
GO:0030308	0.002	1296
GO:0072193	0.002	1297
GO:0072191	0.002	1298
GO:0070670	0.002	1299
GO:0042045	0.002	1300
GO:0032489	0.002	1301
GO:0060445	0.002	1302
GO:0045742	0.002	1303
GO:0005072	0.002	1304
GO:0007405	0.002	1305
GO:0097306	0.002	1306
GO:0031225	0.002	1307
GO:2000341	0.002	1308
GO:0019835	0.002	1309
GO:0042692	0.002	1310
GO:0050918	0.002	1311
GO:0070229	0.002	1312
GO:0008218	0.002	1313
GO:0005161	0.002	1314
GO:0050767	0.002	1315
GO:0045908	0.002	1316
GO:0032059	0.002	1317
GO:0021700	0.002	1318
GO:0000323	0.002	1319
GO:0005764	0.002	1320
GO:0071347	0.002	1321
GO:0045723	0.002	1322
GO:0030097	0.002	1323
GO:0019834	0.002	1324
GO:0097459	0.002	1325
GO:0010464	0.002	1326
GO:0080134	0.002	1327
GO:0009817	0.002	1328
GO:1901664	0.002	1329
GO:0009814	0.002	1330
GO:1901666	0.002	1331
GO:1901570	0.002	1332
GO:0046456	0.002	1333
GO:0043388	0.002	1334
GO:0051270	0.002	1335
GO:0003254	0.002	1336
GO:0010638	0.002	1337
GO:0071453	0.002	1338
GO:0001701	0.002	1339
GO:0072100	0.002	1340
GO:0060503	0.002	1341
GO:0060994	0.002	1342
GO:0061150	0.002	1343
GO:2000137	0.002	1344
GO:0061155	0.002	1345
GO:0072192	0.002	1346
GO:0061151	0.002	1347
GO:0072099	0.002	1348
GO:0072101	0.002	1349
GO:0045927	0.002	1350
GO:0061216	0.002	1351
GO:0072097	0.002	1352
GO:0072096	0.002	1353
GO:0072200	0.002	1354
GO:2000006	0.002	1355
GO:2000005	0.002	1356
GO:0055020	0.002	1357
GO:0048390	0.002	1358
GO:0055018	0.002	1359
GO:0048391	0.002	1360
GO:0048392	0.002	1361
GO:0071893	0.002	1362
GO:0061149	0.002	1363
GO:2000007	0.002	1364
GO:2000004	0.002	1365
GO:2000145	0.002	1366
GO:0007166	0.002	1367
GO:0071306	0.002	1368
GO:0034333	0.002	1369
GO:0014065	0.002	1370
GO:0014850	0.002	1371
GO:0021589	0.002	1372
GO:0060904	0.002	1373
GO:0021577	0.002	1374
GO:0060685	0.002	1375
GO:0098575	0.002	1376
GO:0001667	0.002	1377
GO:0050730	0.002	1378
GO:1901350	0.002	1379
GO:0045669	0.002	1380
GO:0072215	0.002	1381
GO:0031904	0.002	1382
GO:0032369	0.002	1383
GO:0048468	0.002	1384
GO:0072273	0.002	1385
GO:0035265	0.002	1386
GO:0080135	0.002	1387
GO:0022008	0.002	1388
GO:0048870	0.002	1389
GO:0051674	0.002	1390
GO:0071245	0.002	1391
GO:1902488	0.002	1392
GO:1904193	0.002	1393
GO:1904192	0.002	1394
GO:0003203	0.002	1395
GO:0060694	0.002	1396
GO:0032801	0.002	1397
GO:0072312	0.002	1398
GO:0072313	0.002	1399
GO:0072249	0.002	1400
GO:0072244	0.002	1401
GO:0072248	0.002	1402
GO:0051044	0.002	1403
GO:1904951	0.002	1404
GO:0061028	0.002	1405
GO:1904393	0.002	1406
GO:1904395	0.002	1407
GO:0060993	0.002	1408
GO:0004063	0.002	1409
GO:0040012	0.002	1410
GO:1901317	0.002	1411
GO:0048546	0.002	1412
GO:0036294	0.002	1413
GO:0030182	0.002	1414
GO:0030858	0.002	1415
GO:0002520	0.002	1416
GO:0014738	0.002	1417
GO:0048699	0.002	1418
GO:0001935	0.002	1419
GO:0002446	0.002	1420
GO:0031344	0.002	1421
GO:0031529	0.002	1422
GO:0032459	0.002	1423
GO:0018277	0.002	1424
GO:0050722	0.002	1425
GO:0050725	0.002	1426
GO:0032644	0.002	1427
GO:0050756	0.002	1428
GO:0032724	0.002	1429
GO:0050751	0.002	1430
GO:0050752	0.002	1431
GO:0032603	0.002	1432
GO:0050754	0.002	1433
GO:0048534	0.002	1434
GO:0016477	0.002	1435
GO:0030857	0.002	1436
GO:0050755	0.002	1437
GO:0031334	0.001	1438
GO:0070366	0.001	1439
GO:0051055	0.001	1440
GO:0090287	0.001	1441
GO:0030212	0.001	1442
GO:0030334	0.001	1443
GO:0030856	0.001	1444
GO:0061333	0.001	1445
GO:0010224	0.001	1446
GO:0072111	0.001	1447
GO:0080184	0.001	1448
GO:1904398	0.001	1449
GO:0070555	0.001	1450
GO:0055098	0.001	1451
GO:0090185	0.001	1452
GO:0048066	0.001	1453
GO:0070678	0.001	1454
GO:0007597	0.001	1455
GO:2000648	0.001	1456
GO:0040017	0.001	1457
GO:2000364	0.001	1458
GO:0036119	0.001	1459
GO:2000366	0.001	1460
GO:0050900	0.001	1461
GO:0005902	0.001	1462
GO:0007044	0.001	1463
GO:0006275	0.001	1464
GO:1900120	0.001	1465
GO:0043491	0.001	1466
GO:0060348	0.001	1467
GO:0060343	0.001	1468
GO:1903921	0.001	1469
GO:1900756	0.001	1470
GO:1903923	0.001	1471
GO:0007272	0.001	1472
GO:0005575	0.001	1473
GO:0008366	0.001	1474
GO:0048260	0.001	1475
GO:0048738	0.001	1476
GO:0071450	0.001	1477
GO:0071451	0.001	1478
GO:0042552	0.001	1479
GO:0051828	0.001	1480
GO:0052126	0.001	1481
GO:0030260	0.001	1482
GO:0003012	0.001	1483
GO:0051806	0.001	1484
GO:0052192	0.001	1485
GO:0044409	0.001	1486
GO:0045844	0.001	1487
GO:0048636	0.001	1488
GO:2000147	0.001	1489
GO:0008798	0.001	1490
GO:0007435	0.001	1491
GO:0051272	0.001	1492
GO:0097152	0.001	1493
GO:0002502	0.001	1494
GO:2001053	0.001	1495
GO:0002397	0.001	1496
GO:0051239	0.001	1497
GO:0001570	0.001	1498
GO:0042033	0.001	1499
GO:0036120	0.001	1500
GO:0070849	0.001	1501
GO:0030167	0.001	1502
GO:0045445	0.001	1503
GO:0060443	0.001	1504
GO:0034433	0.001	1505
GO:0034434	0.001	1506
GO:0034435	0.001	1507
GO:0050769	0.001	1508
GO:0030335	0.001	1509
GO:0032914	0.001	1510
GO:0001998	0.001	1511
GO:1902630	0.001	1512
GO:1902632	0.001	1513
GO:0031703	0.001	1514
GO:0003251	0.001	1515
GO:0003250	0.001	1516
GO:0034713	0.001	1517
GO:0003249	0.001	1518
GO:0030616	0.001	1519
GO:0072007	0.001	1520
GO:1904238	0.001	1521
GO:0005160	0.001	1522
GO:0072239	0.001	1523
GO:0042447	0.001	1524
GO:0061082	0.001	1525
GO:0072078	0.001	1526
GO:0042222	0.001	1527
GO:0034385	0.001	1528
GO:0034361	0.001	1529
GO:0042313	0.001	1530
GO:0097190	0.001	1531
GO:0050764	0.001	1532
GO:0031707	0.001	1533
GO:0031583	0.001	1534
GO:0043179	0.001	1535
GO:0046332	0.001	1536
GO:0090271	0.001	1537
GO:0060421	0.001	1538
GO:1900026	0.001	1539
GO:0060419	0.001	1540
GO:0090100	0.001	1541
GO:2001188	0.001	1542
GO:0097211	0.001	1543
GO:0097210	0.001	1544
GO:0070459	0.001	1545
GO:0051894	0.001	1546
GO:0043205	0.001	1547
GO:0002065	0.001	1548
GO:0001656	0.001	1549
GO:0070206	0.001	1550
GO:0040011	0.001	1551
GO:0033135	0.001	1552
GO:0004167	0.001	1553
GO:0072091	0.001	1554
GO:0051240	0.001	1555
GO:0044796	0.001	1556
GO:0043626	0.001	1557
GO:0000701	0.001	1558
GO:0051147	0.001	1559
GO:2000107	0.001	1560
GO:0043025	0.001	1561
GO:0035924	0.001	1562
GO:0008150	0.001	1563
GO:0051336	0.001	1564
GO:0032800	0.001	1565
GO:0051341	0.001	1566
GO:0031659	0.001	1567
GO:0060341	0.001	1568
GO:0032535	0.001	1569
GO:0032717	0.001	1570
GO:0022602	0.001	1571
GO:1903019	0.001	1572
GO:1902262	0.001	1573
GO:0043049	0.001	1574
GO:0065003	0.001	1575
GO:1902532	0.001	1576
hsa04614	0.001	1577
GO:0051271	0.001	1578
hsa05219	0.001	1579
GO:1990314	0.001	1580
GO:1900020	0.001	1581
GO:1900019	0.001	1582
GO:0001543	0.001	1583
GO:0022010	0.001	1584
GO:0032291	0.001	1585
GO:0046661	0.001	1586
GO:0001990	0.001	1587
GO:0042160	0.001	1588
GO:0042161	0.001	1589
GO:0044093	0.001	1590
GO:0045109	0.001	1591
GO:0040013	0.001	1592
GO:0005597	0.001	1593
GO:0003272	0.001	1594
GO:0048332	0.001	1595
GO:0043586	0.001	1596
GO:0010718	0.001	1597
GO:0007183	0.001	1598
GO:0072160	0.001	1599
GO:0002070	0.001	1600
GO:0060627	0.001	1601
GO:0072088	0.001	1602
GO:2001233	0.001	1603
GO:2001044	0.001	1604
GO:0005520	0.001	1605
GO:0060517	0.001	1606
GO:0060784	0.001	1607
GO:2001236	0.001	1608
GO:0072080	0.001	1609
GO:0002739	0.001	1610
GO:0044089	0.001	1611
GO:0003331	0.001	1612
GO:0003330	0.001	1613
GO:0048873	0.001	1614
GO:0072109	0.001	1615
GO:0035821	0.001	1616
GO:0014067	0.001	1617
GO:0002053	0.001	1618
GO:0019430	0.001	1619
GO:0061081	0.001	1620
GO:0001890	0.001	1621
GO:0044691	0.001	1622
GO:0072028	0.001	1623
GO:0061326	0.001	1624
GO:0031994	0.001	1625
GO:0070227	0.001	1626
GO:0071379	0.001	1627
GO:0001530	0.001	1628
GO:0060693	0.001	1629
GO:0060342	0.001	1630
GO:0006913	0.001	1631
GO:2001242	0.001	1632
GO:1903553	0.001	1633
GO:0050892	0.001	1634
GO:0007420	0.001	1635
GO:0010871	0.001	1636
GO:0051169	0.001	1637
GO:0031640	0.001	1638
GO:0044364	0.001	1639
GO:0060389	0.001	1640
GO:0042306	0.001	1641
GO:0060749	0.001	1642
GO:0061377	0.001	1643
GO:0046545	0.001	1644
GO:0009966	0.001	1645
GO:0060662	0.001	1646
GO:0060605	0.001	1647
GO:0070946	0.001	1648
GO:0003431	0.001	1649
GO:0090362	0.001	1650
GO:0022604	0.001	1651
GO:1902580	0.001	1652
GO:2000793	0.001	1653
GO:0045185	0.001	1654
GO:0060675	0.001	1655
GO:0072171	0.001	1656
GO:2000229	0.001	1657
GO:0072343	0.001	1658
GO:0034109	0.001	1659
GO:1904589	0.001	1660
GO:0061309	0.001	1661
GO:0061572	0.001	1662
GO:0072009	0.001	1663
hsa04933	0.001	1664
GO:0055025	0.001	1665
GO:0071398	0.001	1666
GO:0030730	0.001	1667
GO:0072071	0.001	1668
GO:0031589	0.001	1669
GO:0072341	0.001	1670
GO:0031092	0.001	1671
GO:0072139	0.001	1672
GO:0051224	0.001	1673
GO:1900086	0.001	1674
GO:0007529	0.001	1675
GO:0006109	0.001	1676
GO:0019966	0.001	1677
GO:1903018	0.001	1678
GO:0045926	0.001	1679
GO:0090288	0.001	1680
GO:0061037	0.001	1681
GO:0002062	0.001	1682
GO:0005773	0.001	1683
GO:0060736	0.001	1684
GO:0050728	0.001	1685
GO:0002262	0.001	1686
GO:0060322	0.001	1687
GO:2001267	0.001	1688
GO:0060009	0.001	1689
GO:0014889	0.001	1690
GO:0061049	0.001	1691
GO:0003301	0.001	1692
GO:0003298	0.001	1693
GO:0051017	0.001	1694
GO:0009792	0.001	1695
GO:0033280	0.001	1696
GO:2000811	0.001	1697
GO:0071675	0.001	1698
GO:0005924	0.001	1699
GO:0051129	0.001	1700
GO:2000243	0.001	1701
GO:1903036	0.001	1702
GO:0051602	0.001	1703
GO:0051794	0.001	1704
GO:0046903	0.001	1705
GO:0042637	0.001	1706
GO:0006766	0.001	1707
GO:0034665	0.001	1708
GO:0098552	0.001	1709
GO:0072255	0.001	1710
GO:0046822	0.001	1711
GO:0008585	0.001	1712
GO:0071288	0.001	1713
GO:1990666	0.001	1714
GO:0006911	0.001	1715
GO:0009897	0.001	1716
GO:0071674	0.001	1717
GO:1903201	0.001	1718
GO:0070201	0.001	1719
GO:0045601	0.001	1720
GO:0051493	0.001	1721
GO:0048143	0.001	1722
GO:0010876	0.001	1723
GO:0060513	0.001	1724
GO:0070848	0.001	1725
GO:0072577	0.001	1726
GO:0043009	0.001	1727
GO:0002682	0.001	1728
GO:0071072	0.001	1729
GO:0005587	0.001	1730
GO:0032330	0.001	1731
GO:1901722	0.001	1732
GO:0046321	0.001	1733
GO:1904426	0.001	1734
GO:0016342	0.001	1735
GO:0030336	0.001	1736
GO:0010656	0.001	1737
GO:0007199	0.001	1738
GO:0043473	0.001	1739
GO:0045073	0.001	1740
GO:0032308	0.001	1741
GO:0034114	0.001	1742
GO:0060438	0.001	1743
GO:2000047	0.001	1744
GO:0030029	0.001	1745
GO:0010623	0.001	1746
GO:0060523	0.001	1747
GO:1901701	0.001	1748
GO:1990712	0.001	1749
GO:0045833	0.001	1750
GO:0045662	0.001	1751
GO:0060420	0.001	1752
GO:0030305	0.001	1753
GO:0035673	0.001	1754
GO:0032268	0.001	1755
GO:1903651	0.001	1756
GO:1903909	0.001	1757
GO:0042311	0.001	1758
GO:1903729	0.001	1759
GO:0035994	0.001	1760
GO:2000241	0.001	1761
GO:0045685	0.001	1762
GO:2000146	0.001	1763
GO:0050920	0.001	1764
GO:1990357	0.001	1765
GO:0071285	0.001	1766
GO:0007015	0.001	1767
GO:0051049	0.001	1768
GO:0002042	0.001	1769
GO:0034358	0.001	1770
GO:1990777	0.001	1771
GO:0006984	0.001	1772
GO:0010260	0.001	1773
GO:0003413	0.001	1774
GO:0051902	0.001	1775
GO:0072074	0.001	1776
GO:0061205	0.001	1777
GO:0072182	0.001	1778
GO:2000116	0.001	1779
GO:2000802	0.001	1780
GO:2000800	0.001	1781
GO:0033363	0.001	1782
GO:0007009	0.001	1783
GO:0005504	0.001	1784
GO:0018214	0.001	1785
GO:0017187	0.001	1786
GO:0005595	0.001	1787
GO:0048638	0.001	1788
GO:0003417	0.001	1789
GO:0003013	0.001	1790
GO:0003179	0.001	1791
GO:0060587	0.001	1792
GO:0034439	0.001	1793
GO:0042554	0.001	1794
GO:0044415	0.001	1795
GO:0019049	0.001	1796
GO:0051832	0.001	1797
GO:0051834	0.001	1798
GO:0044413	0.001	1799
GO:0070228	0.001	1800
GO:0045916	0.001	1801
GO:0048070	0.001	1802
GO:0038066	0.001	1803
GO:0034185	0.001	1804
GO:0005614	0.001	1805
GO:2000242	0.001	1806
GO:0034677	0.001	1807
GO:0061564	0.001	1808
GO:0006957	0.001	1809
GO:0032331	0.001	1810
GO:1903392	0.001	1811
GO:0032444	0.001	1812
GO:0051222	0.001	1813
GO:0001516	0.001	1814
GO:0046457	0.001	1815
GO:0021537	0.001	1816
GO:0051148	0.001	1817
GO:0071260	0.001	1818
GO:0071371	0.001	1819
GO:0008015	0.001	1820
GO:0034681	0.001	1821
GO:0043207	0.001	1822
GO:0051707	0.001	1823
GO:0014826	0.001	1824
GO:0001781	0.001	1825
GO:0014014	0.001	1826
GO:0071363	0.001	1827
GO:0070231	0.001	1828
GO:0061443	0.001	1829
GO:0007569	0.001	1830
GO:0044853	0.001	1831
GO:0003073	0.001	1832
GO:0050931	0.001	1833
GO:0070492	0.001	1834
GO:0045684	0.001	1835
GO:0007043	0.001	1836
GO:2000738	0.001	1837
GO:0061298	0.001	1838
GO:0019218	0.001	1839
GO:0032306	0.001	1840
GO:1900180	0.001	1841
GO:0055001	0.001	1842
GO:0010873	0.001	1843
GO:0009620	0.001	1844
GO:0031782	0.001	1845
GO:0070996	0.001	1846
GO:0031781	0.001	1847
GO:0003160	0.001	1848
GO:0031779	0.001	1849
GO:0006928	0.001	1850
GO:0002740	0.001	1851
GO:0034465	0.001	1852
GO:1904397	0.001	1853
GO:1904391	0.001	1854
GO:1904389	0.001	1855
GO:1904399	0.001	1856
GO:1904373	0.001	1857
hsa04066	0.001	1858
GO:0072008	0.001	1859
GO:0034667	0.001	1860
GO:0001542	0.001	1861
GO:0010769	0.001	1862
GO:1904711	0.001	1863
GO:1904701	0.001	1864
GO:1901296	0.001	1865
GO:1904723	0.001	1866
GO:0032496	0.001	1867
GO:0019902	0.001	1868
GO:0061035	0.001	1869
GO:0034680	0.001	1870
GO:0098858	0.001	1871
GO:0003184	0.001	1872
GO:0003177	0.001	1873
GO:0014033	0.001	1874
GO:0032461	0.001	1875
GO:0051354	0.001	1876
GO:0072049	0.001	1877
GO:0048858	0.001	1878
GO:0072044	0.001	1879
GO:0008584	0.001	1880
GO:0046546	0.001	1881
GO:0010324	0.001	1882
GO:0023051	0.001	1883
GO:0032990	0.001	1884
GO:0070741	0.001	1885
GO:0070102	0.001	1886
GO:1903224	0.001	1887
GO:0035932	0.001	1888
GO:0060135	0.001	1889
GO:0042634	0.001	1890
GO:0035931	0.001	1891
GO:0019959	0.001	1892
GO:0060433	0.001	1893
GO:0030208	0.001	1894
GO:1900127	0.001	1895
GO:0007369	0.001	1896
GO:0072557	0.001	1897
GO:0043217	0.001	1898
GO:0034447	0.001	1899
GO:0032504	0.001	1900
GO:0051895	0.001	1901
GO:0032305	0.001	1902
GO:0007179	0.001	1903
GO:0071498	0.001	1904
GO:0051247	0.001	1905
GO:0051170	0.001	1906
GO:1990254	0.001	1907
GO:0010899	0.001	1908
GO:0034374	0.001	1909
GO:0005509	0.001	1910
GO:1902883	0.001	1911
GO:1900408	0.001	1912
GO:0044744	0.001	1913
GO:0080033	0.001	1914
GO:1902593	0.001	1915
GO:0071250	0.001	1916
GO:0006606	0.001	1917
GO:0050717	0.001	1918
GO:0048010	0.001	1919
GO:0051153	0.001	1920
GO:0030229	0.001	1921
GO:0060751	0.001	1922
GO:0060113	0.001	1923
GO:0043535	0.001	1924
GO:0043085	0.001	1925
GO:1990459	0.001	1926
GO:0032587	0.001	1927
GO:0046666	0.001	1928
GO:0007500	0.001	1929
GO:0032026	0.001	1930
GO:0040034	0.001	1931
GO:2000193	0.001	1932
GO:0046849	0.001	1933
GO:0048246	0.001	1934
GO:1900182	0.001	1935
GO:0051798	0.001	1936
GO:0060484	0.001	1937
GO:0034687	0.001	1938
GO:0098636	0.001	1939
GO:0008305	0.001	1940
GO:0032879	0.001	1941
GO:0048145	0.001	1942
GO:0071284	0.001	1943
GO:0002367	0.001	1944
GO:0007219	0.001	1945
GO:0031103	0.001	1946
GO:0048505	0.001	1947
GO:0034383	0.001	1948
GO:0061217	0.001	1949
GO:1903649	0.001	1950
GO:0043279	0.001	1951
GO:0043497	0.001	1952
GO:0060907	0.001	1953
GO:0006461	0.001	1954
GO:0070271	0.001	1955
hsa05216	0.001	1956
GO:1902547	0.001	1957
GO:0042535	0.001	1958
GO:0043128	0.001	1959
GO:0043126	0.001	1960
GO:0051852	0.001	1961
GO:0051873	0.001	1962
GO:0045545	0.001	1963
GO:2000446	0.001	1964
GO:0003181	0.001	1965
GO:0035988	0.001	1966
GO:0070371	0.001	1967
GO:0051154	0.001	1968
GO:0060174	0.001	1969
GO:0045124	0.001	1970
GO:0044393	0.001	1971
GO:0045168	0.001	1972
GO:0007519	0.001	1973
GO:0070997	0.001	1974
GO:0050790	0.001	1975
GO:1902569	0.001	1976
GO:0046850	0.001	1977
GO:0060753	0.001	1978
GO:1903911	0.001	1979
GO:1901861	0.001	1980
GO:0002090	0.001	1981
GO:0020027	0.001	1982
GO:0010692	0.001	1983
GO:0016192	0.001	1984
GO:0001885	0.001	1985
GO:0097449	0.001	1986
GO:0070372	0.001	1987
GO:2001054	0.001	1988
GO:0060395	0.001	1989
GO:0051799	0.001	1990
GO:0006909	0.001	1991
GO:0048639	0.001	1992
GO:0071065	0.001	1993
GO:0048839	0.001	1994
GO:0043583	0.001	1995
GO:0001541	0.001	1996
GO:0061048	0.001	1997
GO:0051223	0.001	1998
GO:0043171	0.001	1999
[truncated: 18,984 more rows]
